# Supplementary material
Source: PubMed Central journal article supplement (PMC8099539)

## Identification of Distinct Clinical Subphenotypes in Critically Ill Patients With COVID-19

*Charles R. Vasquez, MD, MSCE; Shruti Gupta, MD, MPH; Todd A. Miano, PharmD, PhD; Meaghan Roche, MD, MSCE; Jesse Hsu, PhD; Wei Yang, PhD; Daniel N. Holena, MD, MSCE; John P. Reilly, MD, MSCE; Sarah J. Schrauben, MD, MSCE; David E. Leaf, MD, MMSC; and Michael G.S. Shashaty, MD, MSCE; for the STOP-COVID Investigators*

CHEST 2021; 160(3):929-943

*Online supplements are not copyedited prior to posting and the author(s) take full responsibility for the accuracy of all data.*

© 2021 AMERICAN COLLEGE OF CHEST PHYSICIANS. Reproduction of this article is prohibited without written permission from the American College of Chest Physicians. See online for more details. DOI: 10.1016/j.chest.2021.04.062

## **e-Appendix 1.**

### **Patient Population**

We included consecutive adults ( $\geq 18$  years old) with laboratory-confirmed SARS-CoV-2, detected by polymerase chain reaction of nasopharyngeal or oropharyngeal samples. STOP-COVID was approved using a waiver of informed consent by the Institutional Review Board at each participating study site<sup>1</sup>. Data included demographics, comorbidities, pre-admission medications, symptoms at presentation, and hospital location. Longitudinal data were recorded for the 14 days following ICU admission for physiologic and laboratory variables, medications, and organ support. All patients who remained hospitalized at the time of analysis had a minimum of 28 days of follow-up. Those discharged alive before day 28 were assumed to be alive and free of new complications at 28 days. The accuracy of other collected data was validated using a series of automated and manual verifications, described below.

### **Data Collection and Validation**

Study personnel at each site performed manual chart review and entered data into a secure online database using a standardized case report form. Data were collected using REDCap, a secure, HIPAA-compliant, web-based application. Wherever possible, data were captured using checkboxes rather than manual entry to minimize keystroke errors. For data that required keystroke entry (e.g., laboratory values), we implemented validation ranges to flag potential errors in real-time. We also implemented automated data validation rules to flag errors in dates (e.g., if the date of death was entered as being before the date of ICU admission). Finally, all data were manually reviewed, and values that appeared incongruent or out of range were manually validated by confirming the accuracy of the data with the collaborator who entered it.

### **Definition of an ICU Patient**

Patients were considered to have been admitted to an ICU if they were either admitted to a regular ICU room or if they were in a non-ICU room that was functioning as an ICU room for surge capacity. Non-ICU rooms were considered to be functioning as an ICU room under any of the following conditions: 1) the patient was being treated by an ICU team; 2) the patient was receiving invasive mechanical ventilation or extracorporeal membrane oxygenation; 3) the patient was receiving continuous renal replacement therapy; or 4) the patient was

receiving vasopressors/inotropes or mechanical cardiac support (e.g., ventricular assist device) in a room where this would traditionally not be permitted.

### **Sensitivity Analysis of 28-day mortality in patients discharged from the hospital prior to 28 days**

In a subset of patients consisting of those who had been admitted to one of six hospitals in Boston, MA, and who had been discharged from the hospital prior to 28 days, we manually reviewed their charts or called them to ascertain their 28-day survival status. Among 50 patients reviewed, all 50 remained alive at 28 days.

### **Additional details of statistical methods**

#### **Latent class analysis**

In LCA, there is a distinction between endogenous variables, those that result from and define latent classes, and exogenous variables, patient characteristics that may be associated with but do not define classes.<sup>2,3</sup> We considered demographics, comorbidities, and pre-admission medications to be exogenous, non-class-defining, variables, though their associations with latent classes were subsequently tested (see below). ICU day one variables were used for model fitting. ICU day one was defined as the 24-hour period (spanning from midnight to midnight) on the day of ICU admission. Selection by center, rather than by patient, was performed to facilitate external replication of subphenotypes.

Prior to model fitting, potential class-defining variables were examined by two study investigators (CRV, MGS) to exclude variables with high-missingness. Several variables with missingness between 30-50% (e.g. D-dimer, ferritin) were included if previously reported to be of interest in COVID-19, those with very high missingness were excluded (e.g., IL-6 and fibrinogen, missing in >80% of patients).<sup>4,5</sup> In addition, all continuous variables were log-transformed to satisfy normality assumptions. Pairwise correlations between all potential class-defining variables were calculated. No variables included in the model had a correlation coefficient >0.80 and only a single pair (AST, ALT) had a correlation coefficient between 0.50 and 0.80.

# CHEST® Online Supplement

The general structural equation modelling (gsem) program in Stata/IC 15.1 was used to generate latent class models. This command procedure produces full information maximum likelihood estimates for model parameters using the expectation-maximization (EM) algorithm. Missing data are handled within the EM algorithm using equation-wide deletion, which allows for all available information for a given individual to contribute to model creation. This method assumes data to be missing at random. To further verify the accuracy of this assumption, we compared standardized mean differences across three variables with the highest degree of missingness. To avoid a local maximum solution, we utilized 10 random starting values, each optimized over across 10 iterations, prior to model fitting. For each latent class model, we generated the average probability of being assigned to each class. Each patient was then assigned to the class with the highest probability.

We assessed model fit using several statistical methods, including the Akaike information criteria (AIC), Bayesian information criteria (BIC), and the Vuong-Lo-Mendell-Rubin (VLMR) likelihood ratio test, which compares the fit of a model with  $k$  classes to the fit of one with  $k - 1$  classes<sup>6,7</sup>. The VLMR test was performed using tidyLPA package in the R statistical computing environment (version 4.0.1). A second aspect of model fit relates to the ability to generate high probability of subphenotype assignment, while minimizing the number of poor-fitting patients (i.e. patients with marginal probability of class assignment). Model entropy was also calculated and is normalized to range from 0 to 1, with values closer to one indicating less class uncertainty.<sup>8</sup> Class prevalence was also reported and considered in model determination, favoring a model with classes containing >10% of patients. Finally, clinical interpretability and subject matter knowledge contributed to selection of the most appropriate latent class model.<sup>8,9</sup> A separate sensitivity analysis was performed in which a four subphenotype model was derived within the Discovery cohort including only those patients that were receiving invasive mechanical ventilation on ICU Day 1. Using the results of the latent class analysis as the reference, we also compared the predictive accuracy of a limited variable multinomial logistic regression model, within the Discovery cohort.

Baseline characteristics across the two cohorts and across subphenotypes were compared using descriptive statistics, using median and interquartile ranges for continuous variables and count and percentages for categorical variables, with differences assessed using the Kruskal-Wallis test and  $\chi^2$  test, as appropriate. Prior to generation of heatmaps, to facilitate

comparison across variables with different measurement scales, we standardized all variables to a mean of 0 and a standard deviation of 1.<sup>10</sup>

### **Description of adjusted mortality and outcomes analysis**

Analysis of the association of subphenotype with 28-day mortality was performed without inclusion of additional variables (unadjusted). Adjusted models included the following demographic and comorbidities previously associated with mortality in COVID-19– age, sex, race and ethnicity, hypertension, diabetes, chronic obstructive pulmonary disease, active malignancy, end-stage kidney disease and chronic liver disease; and physiologic measures of illness severity and organ dysfunction – respiratory support and oxygenation, platelet count, creatinine, altered mental status.<sup>11</sup> In addition, given the substantial regional variation in COVID-19 cases during the study enrollment period and to account for hospital-level variation, we adjusted for U.S. region and hospital ICU bed capacity.

All clinical outcomes were assessed daily up to 14 days following ICU admission. ARDS models were adjusted for age, BMI, blood type A, coinfection at ICU admission.<sup>12</sup> AKI models were adjusted for age, BMI, baseline eGFR, diabetes, hypertension, coinfection at ICU admission.<sup>13</sup> Thrombosis models were adjusted for age, BMI, CAD, COPD, CHF, eGFR, active malignancy, coinfection at ICU admission.<sup>14</sup> Infection models were adjusted for age, diabetes, immunosuppression medication, coinfection at ICU admission.<sup>15</sup> New onset CHF models were adjusted for age, BMI, diabetes, hypertension, CHF, CAD, coinfection at ICU admission.<sup>16</sup> The PH assumption was assessed for each outcome using the Grambsch and Therneau test based on Schoenfeld residuals.<sup>17</sup>

## References

1. Gupta S, Hayek SS, Wang W, et al. Factors Associated With Death in Critically Ill Patients With Coronavirus Disease 2019 in the US. *JAMA Intern Med.* 2020.
2. Hagenaaars JA, McCutcheon AL. *Applied latent class analysis.* Cambridge ; New York: Cambridge University Press; 2002.
3. Lanza ST, Savage JS, Birch LL. Identification and prediction of latent classes of weight-loss strategies among women. *Obesity (Silver Spring).* 2010;18(4):833-840.
4. Chen T, Wu D, Chen H, et al. Clinical characteristics of 113 deceased patients with coronavirus disease 2019: retrospective study. *BMJ.* 2020;368:m1091.
5. Wang F, Hou H, Luo Y, et al. The laboratory tests and host immunity of COVID-19 patients with different severity of illness. *JCI Insight.* 2020;5(10).
6. Nylund KL, Asparouhov T, Muthén BO. Deciding on the Number of Classes in Latent Class Analysis and Growth Mixture Modeling: A Monte Carlo Simulation Study. *Structural Equation Modeling: A Multidisciplinary Journal.* 2007;14(4):535-569.
7. Lo Y, Mendell NR, Rubin DB. Testing the number of components in a normal mixture. *Biometrika.* 2001;88(3):767-778.
8. Zhang Z, Abarda A, Contractor AA, Wang J, Dayton CM. Exploring heterogeneity in clinical trials with latent class analysis. *Annals of Translational Medicine.* 2018;6(7):9.
9. Mori M, Krumholz HM, Allore HG. Using Latent Class Analysis to Identify Hidden Clinical Phenotypes. *JAMA.* 2020;324(7):700-701.
10. Bhatraju PK, Zelnick LR, Herting J, et al. Identification of Acute Kidney Injury Subphenotypes with Differing Molecular Signatures and Responses to Vasopressin Therapy. *Am J Respir Crit Care Med.* 2019;199(7):863-872.
11. Williamson EJ, Walker AJ, Bhaskaran K, et al. Factors associated with COVID-19-related death using OpenSAFELY. *Nature.* 2020;584(7821):430-436.
12. Thompson BT, Chambers RC, Liu KD. Acute Respiratory Distress Syndrome. *N Engl J Med.* 2017;377(6):562-572.
13. Hoste EAJ, Kellum JA, Selby NM, et al. Global epidemiology and outcomes of acute kidney injury. *Nat Rev Nephrol.* 2018;14(10):607-625.
14. Wolberg AS, Rosendaal FR, Weitz JI, et al. Venous thrombosis. *Nat Rev Dis Primers.* 2015;1:15006.
15. Rodriguez-Acelas AL, de Abreu Almeida M, Engelman B, Canon-Montanez W. Risk factors for health care-associated infection in hospitalized adults: Systematic review and meta-analysis. *Am J Infect Control.* 2017;45(12):e149-e156.
16. Bui AL, Horwich TB, Fonarow GC. Epidemiology and risk profile of heart failure. *Nat Rev Cardiol.* 2011;8(1):30-41.
17. GRAMBSCH PM, THERNEAU TM. Proportional hazards tests and diagnostics based on weighted residuals. *Biometrika.* 1994;81(3):515-526.

**e-Table 1: List of participating sites**

|                                                                |
|----------------------------------------------------------------|
| <b>Northeast</b>                                               |
| Beth Israel Deaconess Medical Center                           |
| Brigham and Women's Faulkner Hospital                          |
| Brigham and Women's Hospital                                   |
| Cooper University Health Care                                  |
| Hackensack Mountainside Hospital                               |
| Hackensack University Medical Center                           |
| Johns Hopkins Hospital                                         |
| Lowell General Hospital                                        |
| Massachusetts General Hospital                                 |
| MedStar Georgetown University Hospital                         |
| Montefiore Medical Center                                      |
| Mount Sinai Medical Center                                     |
| Newton Wellesley Hospital                                      |
| New York-Presbyterian/Weill Cornell Medical Center             |
| New York University Langone Hospital                           |
| Rutgers/New Jersey Medical School                              |
| Rutgers/Robert Wood Johnson Medical School                     |
| Temple University Hospital                                     |
| Tufts Medical Center                                           |
| University of Pennsylvania Health System                       |
| University of Pittsburgh Medical Center                        |
| Yale University Medical Center                                 |
| <b>South</b>                                                   |
| Baylor College of Medicine, Houston                            |
| Baylor University Medical Center/Baylor Scott White and Health |
| Duke University Medical Center                                 |
| Mayo Clinic, Florida                                           |
| Memphis VA Medical Center                                      |
| Methodist University Hospital                                  |
| Ochsner Medical Center                                         |
| Tulane Medical Center                                          |
| University of Alabama-Birmingham Hospital                      |
| University of Florida Health-Gainesville                       |
| University of Florida Health-Jacksonville                      |
| University of Miami Health System                              |
| University of North Carolina Medical Center                    |
| University of Texas Southwestern Medical Center                |

 **CHEST**<sup>®</sup> Online Supplement

|                                                            |
|------------------------------------------------------------|
| <b>Midwest</b>                                             |
| Barnes-Jewish Hospital                                     |
| Cook County Health                                         |
| Froedtert Hospital                                         |
| Indiana University Health Methodist Hospital               |
| Mayo Clinic, Rochester                                     |
| Medical College of Wisconsin                               |
| Northwestern Memorial Hospital                             |
| Rush University Medical Center                             |
| University Hospitals Cleveland Medical Center              |
| University of Chicago Medical Center                       |
| University of Illinois Hospital and Health Sciences System |
| University of Kentucky Hospital                            |
| University of Michigan Hospital                            |
| University of Oklahoma Health Sciences Center              |
| <b>West</b>                                                |
| Loma Linda University Medical Center                       |
| Mayo Clinic, Arizona                                       |
| Oregon Health and Science University Hospital              |
| Renown Health                                              |
| Stanford Healthcare                                        |
| University of California-Davis Medical Center              |
| University of California-Los Angeles Medical Center        |
| University of California-San Diego Medical Center          |
| University of California-San Francisco Medical Center      |
| UCHealth University of Colorado                            |
| University Medical Center of Southern Nevada               |
| University of Washington Medical Center                    |



**e-Table 2. Definitions of baseline characteristics, comorbidities, treatments, and outcomes**

|                                       |                                                                                                                                                                                                                                          |
|---------------------------------------|------------------------------------------------------------------------------------------------------------------------------------------------------------------------------------------------------------------------------------------|
| <b>Baseline Characteristics</b>       |                                                                                                                                                                                                                                          |
| Baseline serum creatinine             | Lowest value (mg/dl) within 365 to 7 days prior to hospital admission. If not available, serum creatinine on hospital admission                                                                                                          |
| Home medications                      | Medications that the patient was taking at home prior to admission. Does not include those started at an outside hospital if the patient was transferred                                                                                 |
| Anticoagulation                       | Therapeutic anticoagulants, not including anti-platelet agents such as aspirin or clopidogrel                                                                                                                                            |
| Immunosuppressant drugs               | Chemotherapy (in the 30 days prior to admission), corticosteroids >10 mg prednisone/day (or equivalent), calcineurin inhibitors (systemic, not topical), mycophenolate mofetil, azathioprine, rituximab, other                           |
| ACEI/ARB                              | ACEI include lisinopril, fosinopril, captopril, and others; ARB include losartan, valsartan, irbesartan, and others.                                                                                                                     |
| Altered mental status                 | Per chart review                                                                                                                                                                                                                         |
| Coinfection                           | Confirmed or suspected infection(s) on ICU day 1 other than COVID-19                                                                                                                                                                     |
| Respiratory failure severity          | Per chart review. Non-mechanically ventilated patients categorized as none vs. BiPAP, CPAP or HFNC. Patients on mechanical ventilation were additionally stratified by P:F ratio. Patients on ECMO were included as a separate category. |
| Kidney Function                       | eGFR was defined using the CKD-EPI equation. Baseline creatinine was determined as described above.                                                                                                                                      |
| <b>Comorbidities</b>                  |                                                                                                                                                                                                                                          |
| Asthma                                | Per chart review                                                                                                                                                                                                                         |
| Atrial fibrillation                   | Per chart review                                                                                                                                                                                                                         |
| Blood type                            | Per chart review. Blood Type A or other                                                                                                                                                                                                  |
| Bone marrow transplant                | Per chart review                                                                                                                                                                                                                         |
| Cancer                                | Per chart review (lung, breast, colorectal, prostate, gastric, pancreatic, melanoma, ovarian, brain, or other)                                                                                                                           |
| Chronic kidney disease                | Baseline eGFR<60 on at least two consecutive values at least 12 weeks apart prior to hospital admission. If not available, defined as per chart review.                                                                                  |
| Chronic liver disease                 | Cirrhosis, alcohol-related liver disease, nonalcoholic fatty liver disease, autoimmune hepatitis, hepatitis B or hepatitis C, primary biliary cirrhosis, or other                                                                        |
| Chronic obstructive pulmonary disease | Per chart review                                                                                                                                                                                                                         |
| Congestive heart failure              | Per chart review; heart failure with preserved versus reduced ejection fraction                                                                                                                                                          |
| Coronary artery disease               | Per chart review; any history of angina, myocardial infarction, or coronary artery bypass graft surgery                                                                                                                                  |



|                                      |                                                                                                                                                                                                                                                                                                                                            |
|--------------------------------------|--------------------------------------------------------------------------------------------------------------------------------------------------------------------------------------------------------------------------------------------------------------------------------------------------------------------------------------------|
| Diabetes mellitus                    | Per chart review; insulin or non-insulin dependent                                                                                                                                                                                                                                                                                         |
| HIV/AIDS                             | Per chart review                                                                                                                                                                                                                                                                                                                           |
| Hypertension                         | Per chart review                                                                                                                                                                                                                                                                                                                           |
| Solid organ transplant               | Per chart review (kidney, liver, heart, lung, other)                                                                                                                                                                                                                                                                                       |
| Active malignancy                    | Per chart review; any malignancy (other than non-melanoma skin cancer) that was treated in the prior year                                                                                                                                                                                                                                  |
| <b>Longitudinal Treatments*</b>      |                                                                                                                                                                                                                                                                                                                                            |
| PaO <sub>2</sub> †                   | Lowest PaO <sub>2</sub> available on ICU day 1                                                                                                                                                                                                                                                                                             |
| FiO <sub>2</sub> †                   | FiO <sub>2</sub> corresponding to lowest PaO <sub>2</sub>                                                                                                                                                                                                                                                                                  |
| Vasopressors                         | Maximum number of vasopressors and/or inotropes required on ICU day 1, irrespective of specific medication dose.                                                                                                                                                                                                                           |
| <b>Outcomes*</b>                     |                                                                                                                                                                                                                                                                                                                                            |
| Acute kidney Injury‡                 | Defined as $\geq 0.3$ mg/dl increase from baseline creatinine, corresponding with stage 1 of the Kidney Disease: Improving Global Outcomes Criteria <sup>1</sup> . Baseline creatinine was defined as the lowest value (mg/dl) within 365 to 7 days prior to hospital admission. If not available, serum creatinine on hospital admission. |
| Acute respiratory distress syndrome  | Modified Berlin criteria <sup>2</sup> (all three of the following were required): PaO <sub>2</sub> :FiO <sub>2</sub> ratio < 300 mmHg and mechanically ventilated and a diagnosis of ARDS per chart review.                                                                                                                                |
| Congestive heart failure (new onset) | Per chart review; includes both heart failure with preserved and reduced ejection fraction                                                                                                                                                                                                                                                 |
| Infection                            | Per chart review; suspected or confirmed new infection other than COVID-19 that developed after admission to the ICU. Pneumonia (including ventilator-associated), urosepsis, biliary sepsis, bacteremia, other                                                                                                                            |
| Thromboembolic event                 | Per chart review; DVT, PE, stroke, heparin-induced thrombocytopenia, other                                                                                                                                                                                                                                                                 |

Abbreviations: ACEI, angiotensin converting enzyme inhibitor; ARB, angiotensin receptor blocker, ARDS, acute respiratory distress syndrome; BiPAP, bilevel positive airway pressure; COVID-19, coronavirus disease 2019; CPAP; continuous positive airway pressure; DVT, deep vein thrombosis; ECMO, extracorporeal membrane oxygenation; eGFR, estimated glomerular filtration rate; FiO<sub>2</sub>, fraction of inspired oxygen; HFNC, high-flow nasal canula; HIV/AIDS, human immunodeficiency syndrome/acquired immunodeficiency virus; ICU, intensive care unit; PaO<sub>2</sub>, partial pressure of oxygen; P:F, ratio of partial pressure of oxygen to fraction of inspired oxygen; PE, pulmonary embolism.

\* Longitudinal treatments and outcomes were recorded as occurring in the first 14 days following admission to the ICU

† Only applies to patients on mechanical ventilation with arterial blood gas available

‡ Excludes patients with end stage renal disease

#### References:

1. Kidney Disease; Improving Global Outcomes (KDIGO) Acute Kidney Injury Work Group. KDIGO clinical practice guideline for acute kidney injury. *Kidney Int Suppl* 2, 2012: 1-138.
2. The ARDS Definition Task Force. Acute Respiratory Distress Syndrome. The Berlin Definition. *JAMA*, 2012; 307(23): 2526-2533.

**e-Table 3: List of class-defining variables included in latent class models**

|                                           |
|-------------------------------------------|
| <b>ICU Day 1 Vital Signs*</b>             |
| Highest Temperature                       |
| Highest Heart Rate                        |
| Highest Respiratory Rate                  |
| Lowest Systolic Blood Pressure            |
| <b>ICU Admission Diagnosis</b>            |
| Co-infection†                             |
| Respiratory Support & Oxygenation Status‡ |
| Altered Mental Status†                    |
| <b>ICU Day 1 Laboratory Data</b>          |
| White Blood Cell Count                    |
| Lymphocyte %                              |
| Hemoglobin                                |
| Platelet Count                            |
| Creatinine                                |
| Sodium*                                   |
| Albumin                                   |
| AST                                       |
| ALT                                       |
| Bilirubin                                 |
| Lactate                                   |
| Procalcitonin*                            |
| C-Reactive Protein                        |
| D-Dimer                                   |
| Ferritin                                  |
| Creatine Kinase*                          |
| Arterial pH                               |
| <b>Other Clinical Variables</b>           |
| Vasopressor Use§                          |

\*Available on ICU day 1 only

† Defined per chart review, categorized: No, Yes (present)

‡ Categorized: Neither HFNC, NIPPV or MV, BiPAP/CPAP/NFNC, Mechanical ventilation stratified by P:F Ratio > 300, P:F Ratio > 200 to ≤ 300, P:F Ratio > 100 to ≤ 200, P:F Ratio ≤ 100, and ECMO

§ Defined per chart review. Number of unique vasopressor and inotrope medications, irrespective of medication dose

Abbreviations: ICU, intensive care unit; AST; aspartate aminotransferase; ALT, alanine aminotransferase; UOP, urine output; HFNC, high-flow nasal cannula; NIPPV, non-invasive positive pressure ventilation; MV, mechanical ventilation; BiPAP, bilevel positive airway pressure; CPAP, continuous positive airway pressure; P:F, partial pressure of arterial oxygenation to fraction of inspired oxygenation; ECMO, extra-corporeal membrane oxygenation

**e-Table 4: STROBE Statement**

Checklist of items that should be included in reports of *cohort studies*

|                           | <b>Item No</b> | <b>Recommendation</b>                                                                                                                                                                                                                                                |
|---------------------------|----------------|----------------------------------------------------------------------------------------------------------------------------------------------------------------------------------------------------------------------------------------------------------------------|
| <b>Title and abstract</b> | 1              | <p>(a) Indicate the study's design with a commonly used term in the title or the abstract<br/><b>See Abstract.</b></p> <p>(b) Provide in the abstract an informative and balanced summary of what was done and what was found<br/><b>See Abstract.</b></p>           |
| <b>Introduction</b>       |                |                                                                                                                                                                                                                                                                      |
| Background/rationale      | 2              | <p>Explain the scientific background and rationale for the investigation being reported<br/><b>See Introduction paragraph 1 and 2.</b></p>                                                                                                                           |
| Objectives                | 3              | <p>State specific objectives, including any prespecified hypotheses<br/><b>See Introduction paragraph 3.</b></p>                                                                                                                                                     |
| <b>Methods</b>            |                |                                                                                                                                                                                                                                                                      |
| Study design              | 4              | <p>Present key elements of study design early in the paper<br/><b>See Methods section, as well as "Additional detail of statistical methods" in the online data supplement.</b></p>                                                                                  |
| Setting                   | 5              | <p>Describe the setting, locations, and relevant dates, including periods of recruitment, exposure, follow-up, and data collection<br/><b>See Methods section, as well as "Additional detail of statistical methods" in the online data supplement.</b></p>          |
| Participants              | 6              | <p>(a) Give the eligibility criteria, and the sources and methods of selection of participants. Describe methods of follow-up<br/><b>See Methods section, as well as "Additional detail of statistical methods" in the online data supplement.</b></p>               |
|                           |                | <p>(b) For matched studies, give matching criteria and number of exposed and unexposed<br/><b>Not applicable.</b></p>                                                                                                                                                |
| Variables                 | 7              | <p>Clearly define all outcomes, exposures, predictors, potential confounders, and effect modifiers. Give diagnostic criteria, if applicable<br/><b>See Methods section, as well as "Additional detail of statistical methods" in the online data supplement.</b></p> |
| Data sources/measurement  | 8*             | <p>For each variable of interest, give sources of data and details of methods of assessment (measurement). Describe comparability of assessment methods if there is more than one group</p>                                                                          |

|                        |     |                                                                                                                                                                                                                                                                                                                                                                                                                    |
|------------------------|-----|--------------------------------------------------------------------------------------------------------------------------------------------------------------------------------------------------------------------------------------------------------------------------------------------------------------------------------------------------------------------------------------------------------------------|
|                        |     | <b>See Methods section, "Additional detail of statistical methods" in the online data supplement and supplemental e-Table 2</b>                                                                                                                                                                                                                                                                                    |
| Bias                   | 9   | Describe any efforts to address potential sources of bias<br><b>See Methods section, as well as "Additional detail of statistical methods" in the online data supplement.</b>                                                                                                                                                                                                                                      |
| Study size             | 10  | Explain how the study size was arrived at<br><b>See Methods section, as well as "Additional detail of statistical methods" in the online data supplement.</b>                                                                                                                                                                                                                                                      |
| Quantitative variables | 11  | Explain how quantitative variables were handled in the analyses. If applicable, describe which groupings were chosen and why<br><b>See Methods section, as well as "Additional detail of statistical methods" in the online data supplement</b>                                                                                                                                                                    |
| Statistical methods    | 12  | (a) Describe all statistical methods, including those used to control for confounding<br><b>See Methods section, as well as "Additional detail of statistical methods" in the online data supplement.</b>                                                                                                                                                                                                          |
|                        |     | (b) Describe any methods used to examine subgroups and interactions<br><b>See Methods section, as well as "Additional detail of statistical methods" in the online data supplement.</b>                                                                                                                                                                                                                            |
|                        |     | (c) Explain how missing data were addressed<br><b>See Methods section, as well as "Additional detail of statistical methods" in the online data supplement.</b>                                                                                                                                                                                                                                                    |
|                        |     | (d) If applicable, explain how loss to follow-up was addressed<br><b>See Methods section, as well as "Additional detail of statistical methods" in the online data supplement.</b>                                                                                                                                                                                                                                 |
|                        |     | (e) Describe any sensitivity analyses<br><b>See Methods section, as well as "Additional detail of statistical methods" in the online data supplement.</b>                                                                                                                                                                                                                                                          |
| <b>Results</b>         |     |                                                                                                                                                                                                                                                                                                                                                                                                                    |
| Participants           | 13* | (a) Report numbers of individuals at each stage of study—eg numbers potentially eligible, examined for eligibility, confirmed eligible, included in the study, completing follow-up, and analysed<br><b>See Methods section, as well as "Additional detail of statistical methods" in the online data supplement, Table 1, and supplemental e-Figure 1</b><br>(b) Give reasons for non-participation at each stage |

|                  |     |                                                                                                                                                                                                                                                                                                                                                                                                                                       |
|------------------|-----|---------------------------------------------------------------------------------------------------------------------------------------------------------------------------------------------------------------------------------------------------------------------------------------------------------------------------------------------------------------------------------------------------------------------------------------|
|                  |     | <p><b>See Methods section, as well as “Additional detail of statistical methods” in the online data supplement, supplemental e-Figure 1</b></p> <p>(c) Consider use of a flow diagram<br/><b>See supplemental e-Figure 1.</b></p>                                                                                                                                                                                                     |
| Descriptive data | 14* | <p>(a) Give characteristics of study participants (eg demographic, clinical, social) and information on exposures and potential confounders<br/><b>See “Discovery and Replication” subheading of results and Table 1.</b></p>                                                                                                                                                                                                         |
|                  |     | <p>(b) Indicate number of participants with missing data for each variable of interest<br/><b>See Table 1.</b></p>                                                                                                                                                                                                                                                                                                                    |
|                  |     | <p>(c) Summarise follow-up time (eg, average and total amount)<br/><b>Described in Methods section. Mortality assessed at 28 days from ICU admission. Clinical outcomes assessed at 14 days from ICU admission.</b></p>                                                                                                                                                                                                               |
| Outcome data     | 15* | <p>Report numbers of outcome events or summary measures over time<br/><b>See “Association of COVID-19 subphenotypes with 28-day mortality” and “Association of COVID-19 subphenotypes with 14-day clinical outcomes” subheadings of the Results section, Figure 3, and Table 4.</b></p>                                                                                                                                               |
| Main results     | 16  | <p>(a) Give unadjusted estimates and, if applicable, confounder-adjusted estimates and their precision (eg, 95% confidence interval). Make clear which confounders were adjusted for and why they were included<br/><b>See “Association of COVID-19 subphenotypes with 28-day mortality” and “Association of COVID-19 subphenotypes with 14-day clinical outcomes” subheadings of the Results section, Table 2, and Table E9.</b></p> |
|                  |     | <p>(b) Report category boundaries when continuous variables were categorized<br/><b>See e-Table 2.</b></p>                                                                                                                                                                                                                                                                                                                            |
|                  |     | <p>(c) If relevant, consider translating estimates of relative risk into absolute risk for a meaningful time period<br/><b>Multivariable associations of subphenotype with mortality and clinical outcomes are presented as relative risks and hazard ratios, respectively.</b></p>                                                                                                                                                   |
| Other analyses   | 17  | <p>Report other analyses done—eg analyses of subgroups and interactions, and sensitivity analyses<br/><b>See “Identification of COVID-19 critical illness subphenotypes” and “Characteristics distinguishing COVID-19 subphenotypes” subheadings of the Results section, Figure 1, and supplementary tables and figures.</b></p>                                                                                                      |

| <b>Discussion</b>        |    |                                                                                                                                                                                                                                                            |
|--------------------------|----|------------------------------------------------------------------------------------------------------------------------------------------------------------------------------------------------------------------------------------------------------------|
| Key results              | 18 | Summarise key results with reference to study objectives<br><b>See Abstract and Discussion paragraph 1.</b>                                                                                                                                                |
| Limitations              | 19 | Discuss limitations of the study, taking into account sources of potential bias or imprecision. Discuss both direction and magnitude of any potential bias<br><b>See Discussion paragraph 8-9.</b>                                                         |
| Interpretation           | 20 | Give a cautious overall interpretation of results considering objectives, limitations, multiplicity of analyses, results from similar studies, and other relevant evidence<br><b>See Discussion paragraph 10.</b>                                          |
| Generalisability         | 21 | Discuss the generalisability (external validity) of the study results<br><b>See Discussion paragraph 7</b>                                                                                                                                                 |
| <b>Other information</b> |    |                                                                                                                                                                                                                                                            |
| Funding                  | 22 | Give the source of funding and the role of the funders for the present study and, if applicable, for the original study on which the present article is based<br><b>See Funding and Funding Acknowledgement statement at the bottom of the title page.</b> |

\*Give information separately for exposed and unexposed groups.

**Note:** An Explanation and Elaboration article discusses each checklist item and gives methodological background and published examples of transparent reporting. The STROBE checklist is best used in conjunction with this article (freely available on the Web sites of PLoS Medicine at <http://www.plosmedicine.org/>, Annals of Internal Medicine at <http://www.annals.org/>, and Epidemiology at <http://www.epidem.com/>). Information on the STROBE Initiative is available at <http://www.strobe-statement.org>.

**e-Table 5: Comparison of standardized mean differences in class-defining and baseline characteristics in three representative variables with high levels of missing data**

Ferritin, D-dimer and creatine kinase (CK) represent the three class-defining variables with the highest rate of missing data across the combined study population. Ferritin was missing in 44% of patients, D-dimer was missing in 50% of patients, and CK was missing in 54% of patients.

| <b>Ferritin</b>                                   | <b>Non-missing</b> | <b>Missing</b> | <b>Standardized Mean Difference</b> |
|---------------------------------------------------|--------------------|----------------|-------------------------------------|
| <b>n (%)</b>                                      | 1849 (56.0)        | 1451 (44.0)    |                                     |
| <b>Baseline Characteristics</b>                   |                    |                |                                     |
| <b>Age (years)</b>                                | 61 (14.4)          | 62 (14.4)      | 0.064                               |
| <b>Male</b>                                       | 1190 (64.4)        | 930 (64.1)     | 0.006                               |
| <b>Race</b>                                       |                    |                |                                     |
| White                                             | 670 (36.2)         | 551 (38.0)     | 0.036                               |
| Black                                             | 564 (30.5)         | 479 (33.0)     | 0.054                               |
| Other                                             | 145 (7.8)          | 110 (7.6)      | 0.010                               |
| Unknown                                           | 470 (25.4)         | 311 (21.4)     | 0.094                               |
| <b>Hispanic Ethnicity</b>                         | 412 (22.3)         | 266 (18.3)     | 0.098                               |
| <b>BMI (kg/m<sup>2</sup>)</b>                     | 32 (9)             | 32 (8)         | 0.054                               |
| <b>Diabetes</b>                                   | 771 (41.7)         | 587 (40.5)     | 0.025                               |
| <b>Hypertension</b>                               | 1128 (61.0)        | 908 (62.6)     | 0.032                               |
| <b>CKD stage</b>                                  |                    |                |                                     |
| Normal - eGFR ≥ 90                                | 608 (32.9)         | 441 (30.4)     | 0.054                               |
| Stage 1 - eGFR 60 to < 90                         | 646 (34.9)         | 531 (36.6)     | 0.035                               |
| Stage 2 - eGFR 30 < 60                            | 385 (20.8)         | 298 (20.5)     | 0.007                               |
| Stage 3-4 - eGFR 15 < 30                          | 86 (4.7)           | 74 (5.1)       | 0.021                               |
| Stage 5 - eGFR <15 or HD                          | 124 (6.7)          | 107 (7.4)      | 0.026                               |
| <b>Coronary Artery Disease</b>                    | 253 (13.7)         | 204 (14.1)     | 0.011                               |
| <b>Congestive Heart Failure</b>                   | 171 (9.2)          | 157 (10.8)     | 0.052                               |
| <b>Atrial Fibrillation or Flutter</b>             | 115 (6.2)          | 121 (8.3)      | 0.082                               |
| <b>Chronic Obstructive Pulmonary Disease</b>      | 153 (8.3)          | 125 (8.6)      | 0.012                               |
| <b>Asthma</b>                                     | 188 (10.2)         | 159 (11.0)     | 0.026                               |
| <b>Chronic Liver Disease</b>                      | 59 (3.2)           | 53 (3.7)       | 0.025                               |
| <b>HIV/AIDS</b>                                   | 27 (1.5)           | 21 (1.4)       | 0.001                               |
| <b>Active Malignancy</b>                          | 78 (4.2)           | 84 (5.8)       | 0.072                               |
| <b>Solid Organ Transplant</b>                     | 62 (3.4)           | 44 (3.0)       | 0.018                               |
| <b>Bone Marrow Transplant</b>                     | 2 (0.1)            | 6 (0.4)        | 0.060                               |
| <b>Blood Type A</b>                               | 385 (20.8)         | 298 (20.5)     | 0.007                               |
| <b>Smoking Status</b>                             |                    |                |                                     |
| Non-smoker                                        | 1069 (57.8)        | 786 (54.2)     | 0.073                               |
| Current/Former                                    | 519 (28.1)         | 465 (32.0)     | 0.087                               |
| Unknown                                           | 261 (14.1)         | 200 (13.8)     | 0.010                               |
| <b>Pre-admission ACEI or ARB</b>                  | 628 (34.0)         | 495 (34.1)     | 0.003                               |
| <b>Pre-admission Anticoagulation</b>              | 170 (9.2)          | 153 (10.5)     | 0.045                               |
| <b>Pre-admission Immunosuppressive Medication</b> | 194 (10.5)         | 148 (10.2)     | 0.009                               |



| <b>Class-Defining Variables</b>                           |              |             |       |
|-----------------------------------------------------------|--------------|-------------|-------|
| <b>Coinfection on ICU Day 1</b>                           | 357 (19.3)   | 369 (25.4)  | 0.148 |
| <b>Altered Mental Status on ICU Day 1</b>                 | 399 (21.6)   | 358 (24.7)  | 0.071 |
| <b>T<sub>max</sub> ICU Day 1 (°F)</b>                     | 100.5 (1.8)  | 100.5 (1.9) | 0.008 |
| <b>HR<sub>max</sub> ICU Day 1</b>                         | 106 (22)     | 106 (21)    | 0.017 |
| <b>SBP<sub>min</sub> ICU Day 1 (mmHg)</b>                 | 98 (20)      | 99 (21)     | 0.034 |
| <b>RR<sub>max</sub> ICU Day 1</b>                         | 33 (10)      | 32 (9)      | 0.128 |
| <b>Respiratory Support &amp; Oxygenation on ICU Day 1</b> |              |             | 0.145 |
| Neither HFNC, NIPPV or MV*                                | 190 (10.3)   | 231 (15.9)  |       |
| BiPAP, CPAP, HFNC or NRB                                  | 410 (22.2)   | 310 (21.4)  |       |
| Vent P/F > 300                                            | 268 (14.5)   | 254 (17.5)  |       |
| Vent P/F > 200 to ≤ 300                                   | 187 (10.1)   | 104 (7.2)   |       |
| Vent P/F > 100 to ≤ 200                                   | 433 (23.4)   | 295 (20.3)  |       |
| Vent P/F ≤ 100                                            | 349 (18.9)   | 251 (17.3)  |       |
| ECMO                                                      | 12 (0.6)     | 6 (0.4)     |       |
| <b># Vasoactive Infusions on ICU Day 1</b>                | 1 (1)        | 1 (1)       | 0.071 |
| <b>White Blood Cell Count (K/mm<sup>3</sup>)</b>          | 9.6 (6.0)    | 9.5 (10.5)  | 0.014 |
| <b>Lymphocyte %</b>                                       | 11.1 (7.5)   | 12.6 (8.7)  | 0.175 |
| <b>Hemoglobin (g/dl)</b>                                  | 12.5 (2.2)   | 12.4 (2.3)  | 0.059 |
| <b>Platelet Count (K/mm<sup>3</sup>)</b>                  | 231 (96)     | 216 (88)    | 0.166 |
| <b>Creatinine (mg/dl)</b>                                 | 1.81 (2.32)  | 1.82 (2.31) | 0.005 |
| <b>Albumin (g/dl)</b>                                     | 3.2 (0.6)    | 3.2 (0.6)   | 0.012 |
| <b>AST (U/L)</b>                                          | 94 (296)     | 100 (308)   | 0.020 |
| <b>ALT (U/L)</b>                                          | 60 (109)     | 62 (145)    | 0.018 |
| <b>Total Bilirubin (mg/dl)</b>                            | 0.8 (1.7)    | 0.7 (1.0)   | 0.018 |
| <b>Lactate (mmol/L)</b>                                   | 2.0 (1.8)    | 2.1 (2.2)   | 0.047 |
| <b>CRP (mg/L)</b>                                         | 175 (105)    | 157 (104)   | 0.168 |
| <b>Arterial pH</b>                                        | 7.35 (0.11)  | 7.36 (0.13) | 0.038 |
| <b>D-dimer (ng/ml)</b>                                    | 4485 (10454) | 4075 (8241) | 0.044 |
| <b>Ferritin (ng/ml)</b>                                   | 2009 (4275)  | · (·)       | n/a   |
| <b>Procalcitonin (ng/ml)</b>                              | 3.97 (16.10) | 2.30 (9.47) | 0.126 |
| <b>CK (U/L)</b>                                           | 759 (3639)   | 912 (3395)  | 0.044 |

Abbreviations: BMI, body mass index; CKD, chronic kidney disease; eGFR, estimated glomerular filtration rate (via CKD-EPI equation); HIV/AIDS, human immunodeficiency virus/acquired immune deficiency syndrome; ACEI, angiotensin converting enzyme inhibitor; ARB, angiotensin receptor blocker; ICU, intensive care unit; HR, heart rate; SBP, systolic blood pressure; RR, respiratory rate; HFNC, high-flow nasal cannula; MV, mechanical ventilation; NIPPV, non-invasive positive pressure ventilation; BiPAP, bilevel positive airway pressure; CPAP, continuous positive airway pressure; NRB, non-rebreather mask; P:F, partial pressure of arterial oxygenation to fraction of inspired oxygenation; ECMO, extra-corporeal membrane oxygenation; UOP, urine output; AST, aspartate aminotransferase; ALT, alanine aminotransferase; CRP, c-reactive protein; CK, creatine kinase

\* Includes patients that received supplemental oxygen by nasal cannula administration

| D-dimer                                                   | Non-missing | Missing     | Standardized Mean Difference |
|-----------------------------------------------------------|-------------|-------------|------------------------------|
| <b>n (%)</b>                                              | 1654 (50.1) | 1646 (49.9) |                              |
| <b>Baseline Characteristics</b>                           |             |             |                              |
| <b>Age (years)</b>                                        | 61 (14)     | 61 (14)     | 0.043                        |
| <b>Male</b>                                               | 1066 (64.4) | 1054 (64.0) | 0.009                        |
| <b>Race</b>                                               |             |             |                              |
| White                                                     | 594 (35.9)  | 627 (38.1)  | 0.045                        |
| Black                                                     | 519 (31.4)  | 524 (31.8)  | 0.010                        |
| Other                                                     | 126 (7.6)   | 129 (7.8)   | 0.008                        |
| Unknown                                                   | 415 (25.1)  | 366 (22.2)  | 0.067                        |
| <b>Hispanic Ethnicity</b>                                 | 368 (22.2)  | 310 (18.8)  | 0.085                        |
| <b>BMI (kg/m<sup>2</sup>)</b>                             | 32 (9)      | 32 (8)      | 0.003                        |
| <b>Diabetes</b>                                           | 679 (41.1)  | 679 (41.3)  | 0.004                        |
| <b>Hypertension</b>                                       | 1009 (61.0) | 1027 (62.4) | 0.029                        |
| <b>CKD stage</b>                                          |             |             |                              |
| Normal - eGFR ≥ 90                                        | 541 (32.7)  | 508 (30.9)  | 0.040                        |
| Stage 1 - eGFR 60 to <90                                  | 595 (36.0)  | 582 (35.4)  | 0.013                        |
| Stage 2 - eGFR 30 to <60                                  | 331 (20.0)  | 352 (21.4)  | 0.034                        |
| Stage 3-4 - eGFR 15 to <30                                | 80 (4.8)    | 80 (4.9)    | 0.001                        |
| Stage 5 - eGFR <15 or HD                                  | 107 (6.5)   | 124 (7.5)   | 0.042                        |
| <b>Coronary Artery Disease</b>                            | 218 (13.2)  | 239 (14.5)  | 0.039                        |
| <b>Congestive Heart Failure</b>                           | 150 (9.1)   | 178 (10.8)  | 0.058                        |
| <b>Atrial Fibrillation or Flutter</b>                     | 97 (5.9)    | 139 (8.4)   | 0.100                        |
| <b>Chronic Obstructive Pulmonary Disease</b>              | 130 (7.9)   | 148 (9.0)   | 0.041                        |
| <b>Asthma</b>                                             | 182 (11.0)  | 165 (10.0)  | 0.032                        |
| <b>Chronic Liver Disease</b>                              | 50 (3.0)    | 62 (3.8)    | 0.041                        |
| <b>HIV/AIDS</b>                                           | 21 (1.3)    | 27 (1.6)    | 0.031                        |
| <b>Active Malignancy</b>                                  | 66 (4.0)    | 96 (5.8)    | 0.085                        |
| <b>Solid Organ Transplant</b>                             | 58 (3.5)    | 48 (2.9)    | 0.033                        |
| <b>Bone Marrow Transplant</b>                             | 3 (0.2)     | 5 (0.3)     | 0.025                        |
| <b>Blood Type A</b>                                       | 341 (20.6)  | 342 (20.8)  | 0.004                        |
| <b>Smoking Status</b>                                     |             |             |                              |
| Non-smoker                                                | 945 (57.1)  | 910 (55.3)  | 0.037                        |
| Current/Former                                            | 464 (28.1)  | 520 (31.6)  | 0.077                        |
| Unknown                                                   | 245 (14.8)  | 216 (13.1)  | 0.049                        |
| <b>Pre-admission ACEI or ARB</b>                          | 576 (34.8)  | 547 (33.2)  | 0.034                        |
| <b>Pre-admission Anticoagulation</b>                      | 150 (9.1)   | 173 (10.5)  | 0.049                        |
| <b>Pre-admission Immunosuppressive Medication</b>         | 178 (10.8)  | 164 (10.0)  | 0.026                        |
| <b>Class-Defining Variables</b>                           |             |             |                              |
| <b>Coinfection on ICU Day 1</b>                           | 326 (19.7)  | 400 (24.3)  | 0.112                        |
| <b>Altered Mental Status on ICU Day 1</b>                 | 333 (20.1)  | 424 (25.8)  | 0.133                        |
| <b>T<sub>max</sub> ICU Day 1 (°F)</b>                     | 100.5 (1.8) | 100.5 (1.8) | 0.013                        |
| <b>HR<sub>max</sub> ICU Day 1</b>                         | 107 (23)    | 105 (21)    | 0.052                        |
| <b>SBP<sub>min</sub> ICU Day 1 (mmHg)</b>                 | 98 (20)     | 99 (21)     | 0.066                        |
| <b>RR<sub>max</sub> ICU Day 1</b>                         | 33 (10)     | 32 (9)      | 0.145                        |
| <b>Respiratory Support &amp; Oxygenation on ICU Day 1</b> |             |             | 0.118                        |
| Neither HFNC, NIPPV or MV*                                | 183 (11.1)  | 238 (14.5)  |                              |
| BiPAP, CPAP, HFNC or NRB                                  | 352 (21.3)  | 368 (22.4)  |                              |
| Vent P/F > 300                                            | 246 (14.9)  | 276 (16.8)  |                              |
| Vent P/F > 200 to ≤ 300                                   | 155 (9.4)   | 136 (8.3)   |                              |



|                                                  |              |             |       |
|--------------------------------------------------|--------------|-------------|-------|
| Vent P/F > 100 to ≤ 200                          | 404 (24.4)   | 324 (19.7)  |       |
| Vent P/F ≤ 100                                   | 300 (18.1)   | 300 (18.2)  |       |
| ECMO                                             | 14 (0.8)     | 4 (0.2)     |       |
| <b># Vasoactive Infusions on ICU Day 1</b>       | 1 (1)        | 1 (1)       | 0.134 |
| <b>White Blood Cell Count (K/mm<sup>3</sup>)</b> | 9.6 (5.2)    | 9.5 (10.5)  | 0.004 |
| <b>Lymphocyte %</b>                              | 11.1 (7.3)   | 12.4 (8.7)  | 0.167 |
| <b>Hemoglobin (g/dl)</b>                         | 12.6 (2.2)   | 12.4 (2.3)  | 0.096 |
| <b>Platelet Count (K/mm<sup>3</sup>)</b>         | 231 (95)     | 217 (90)    | 0.15  |
| <b>Creatinine (mg/dl)</b>                        | 1.80 (2.29)  | 1.83 (2.34) | 0.012 |
| <b>Albumin (g/dl)</b>                            | 3.2 (0.6)    | 3.2 (0.6)   | 0.042 |
| <b>AST (U/L)</b>                                 | 98 (328)     | 95 (263)    | 0.010 |
| <b>ALT (U/L)</b>                                 | 60 (112)     | 61 (137)    | 0.011 |
| <b>Total Bilirubin (mg/dl)</b>                   | 0.8 (1.3)    | 0.8 (1.6)   | 0.013 |
| <b>Lactate (mmol/L)</b>                          | 2.0 (1.8)    | 2.1 (2.2)   | 0.041 |
| <b>CRP (mg/L)</b>                                | 175 (106)    | 163 (103)   | 0.111 |
| <b>Arterial pH</b>                               | 7.35 (0.11)  | 7.36 (0.13) | 0.026 |
| <b>D-dimer (ng/ml)</b>                           | 4407 (10069) | · (·)       | n/a   |
| <b>Ferritin (ng/ml)</b>                          | 1947 (4146)  | 2171 (4597) | 0.051 |
| <b>Procalcitonin (ng/ml)</b>                     | 4.28 (17.32) | 2.11 (7.55) | 0.162 |
| <b>CK (U/L)</b>                                  | 676 (1557)   | 1002 (5092) | 0.087 |

Abbreviations: BMI, body mass index; CKD, chronic kidney disease; eGFR, estimated glomerular filtration rate (via CKD-EPI equation); HIV/AIDS, human immunodeficiency virus/acquired immune deficiency syndrome; ACEI, angiotensin converting enzyme inhibitor; ARB, angiotensin receptor blocker; ICU, intensive care unit; HR, heart rate; SBP, systolic blood pressure; RR, respiratory rate; HFNC, high-flow nasal cannula; MV, mechanical ventilation; NIPPV, non-invasive positive pressure ventilation; BiPAP, bilevel positive airway pressure; CPAP, continuous positive airway pressure; NRB, non-rebreather mask; P:F, partial pressure of arterial oxygenation to fraction of inspired oxygenation; ECMO, extra-corporeal membrane oxygenation; UOP, urine output; AST, aspartate aminotransferase; ALT, alanine aminotransferase; CRP, c-reactive protein; CK, creatine kinase

\* Includes patients that received supplemental oxygen by nasal cannula administration

|                                                   | <b>Non-missing</b> | <b>Missing</b> | <b>Standardized Mean Difference</b> |
|---------------------------------------------------|--------------------|----------------|-------------------------------------|
| <b>Creatine Kinase</b>                            |                    |                |                                     |
| <b>n (%)</b>                                      | 1505 (45.6)        | 1795 (54.4)    |                                     |
| <b>Baseline Characteristics</b>                   |                    |                |                                     |
| <b>Age (years)</b>                                | 61 (14)            | 61 (15)        | 0.011                               |
| <b>Male</b>                                       | 968 (64.3)         | 1152 (64.2)    | 0.003                               |
| <b>Race</b>                                       |                    |                |                                     |
| White                                             | 540 (35.9)         | 681 (37.9)     |                                     |
| Black                                             | 443 (29.4)         | 600 (33.4)     |                                     |
| Other                                             | 115 (7.6)          | 140 (7.8)      |                                     |
| Unknown                                           | 407 (27.0)         | 374 (20.8)     |                                     |
| <b>Hispanic Ethnicity</b>                         | 319 (21.2)         | 359 (20.0)     | 0.03                                |
| <b>BMI (kg/m<sup>2</sup>)</b>                     | 32 (8)             | 32 (9)         | 0.007                               |
| <b>Diabetes</b>                                   | 597 (39.7)         | 761 (42.4)     | 0.055                               |
| <b>Hypertension</b>                               | 918 (61.0)         | 1118 (62.3)    | 0.026                               |
| <b>CKD stage</b>                                  |                    |                |                                     |
| Normal - eGFR ≥ 90                                | 469 (31.2)         | 580 (32.3)     | 0.025                               |
| Stage 1 - eGFR 60 to < 90                         | 572 (38.0)         | 605 (33.7)     | 0.090                               |
| Stage 2 - eGFR 30 to < 60                         | 348 (23.1)         | 335 (18.7)     | 0.110                               |
| Stage 3-4 - eGFR 15 to < 30                       | 80 (5.3)           | 80 (4.5)       | 0.040                               |
| Stage 5 - eGFR <15 or HD                          | 36 (2.4)           | 195 (10.9)     | 0.346                               |
| <b>Coronary Artery Disease</b>                    | 192 (12.8)         | 265 (14.8)     | 0.058                               |
| <b>Congestive Heart Failure</b>                   | 123 (8.2)          | 205 (11.4)     | 0.109                               |
| <b>Atrial Fibrillation or Flutter</b>             | 92 (6.1)           | 144 (8.0)      | 0.075                               |
| <b>Chronic Obstructive Pulmonary Disease</b>      | 125 (8.3)          | 153 (8.5)      | 0.008                               |
| <b>Asthma</b>                                     | 170 (11.3)         | 177 (9.9)      | 0.047                               |
| <b>Chronic Liver Disease</b>                      | 50 (3.3)           | 62 (3.5)       | 0.007                               |
| <b>HIV/AIDS</b>                                   | 17 (1.1)           | 31 (1.7)       | 0.050                               |
| <b>Active Malignancy</b>                          | 73 (4.9)           | 89 (5.0)       | 0.005                               |
| <b>Solid Organ Transplant</b>                     | 40 (2.7)           | 66 (3.7)       | 0.058                               |
| <b>Bone Marrow Transplant</b>                     | 5 (0.3)            | 3 (0.2)        | 0.033                               |
| <b>Blood Type A</b>                               | 341 (22.7)         | 342 (19.1)     | 0.089                               |
| <b>Smoking Status</b>                             |                    |                |                                     |
| Non-smoker                                        | 846 (56.2)         | 1009 (56.2)    | <0.001                              |
| Current/Former                                    | 430 (28.6)         | 554 (30.9)     | 0.050                               |
| Unknown                                           | 229 (15.2)         | 232 (12.9)     | 0.066                               |
| <b>Pre-admission ACEI or ARB</b>                  | 519 (34.5)         | 604 (33.6)     | 0.018                               |
| <b>Pre-admission Anticoagulation</b>              | 134 (8.9)          | 189 (10.5)     | 0.055                               |
| <b>Pre-admission Immunosuppressive Medication</b> | 129 (8.6)          | 213 (11.9)     | 0.110                               |
| <b>Class-Defining Variables</b>                   |                    |                |                                     |
| <b>Coinfection on ICU Day 1</b>                   | 288 (19.1)         | 438 (24.4)     | 0.127                               |
| <b>Altered Mental Status on ICU Day 1</b>         | 353 (23.5)         | 404 (22.5)     | 0.024                               |
| <b>T<sub>max</sub> ICU Day 1 (°F)</b>             | 100.5 (1.8)        | 100.5 (1.8)    | 0.017                               |
| <b>HR<sub>max</sub> ICU Day 1</b>                 | 105 (22)           | 106 (22)       | 0.040                               |
| <b>SBP<sub>min</sub> ICU Day 1 (mmHg)</b>         | 98 (20)            | 99 (21)        | 0.028                               |
| <b>RR<sub>max</sub> ICU Day 1</b>                 | 33 (9)             | 32 (9)         | 0.018                               |

|                                                           |              |             |       |
|-----------------------------------------------------------|--------------|-------------|-------|
| <b>Respiratory Support &amp; Oxygenation on ICU Day 1</b> |              |             | 0.193 |
| Neither HFNC, NIPPV or MV*                                | 150 (10.0)   | 271 (15.1)  |       |
| BiPAP, CPAP, HFNC or NRB                                  | 301 (20.0)   | 419 (23.3)  |       |
| Vent P/F > 300                                            | 230 (15.3)   | 292 (16.3)  |       |
| Vent P/F > 200 to ≤ 300                                   | 143 (9.5)    | 148 (8.2)   |       |
| Vent P/F > 100 to ≤ 200                                   | 381 (25.3)   | 347 (19.3)  |       |
| Vent P/F ≤ 100                                            | 292 (19.4)   | 308 (17.2)  |       |
| ECMO                                                      | 8 (0.5)      | 10 (0.6)    |       |
| <b># Vasoactive Infusions on ICU Day 1</b>                | 1 (1)        | 1 (1)       | 0.192 |
| <b>White Blood Cell Count (K/mm<sup>3</sup>)</b>          | 9.8 (6.4)    | 9.4 (9.4)   | 0.046 |
| <b>Lymphocyte %</b>                                       | 11.7 (8.2)   | 11.7 (7.9)  | 0.009 |
| <b>Hemoglobin (g/dl)</b>                                  | 12.6 (2.1)   | 12.4 (2.3)  | 0.106 |
| <b>Platelet Count (K/mm<sup>3</sup>)</b>                  | 229 (95)     | 221 (91)    | 0.093 |
| <b>Creatinine (mg/dl)</b>                                 | 1.54 (1.43)  | 2.05 (2.84) | 0.229 |
| <b>Albumin (g/dl)</b>                                     | 3.2 (0.6)    | 3.2 (0.6)   | 0.042 |
| <b>AST (U/L)</b>                                          | 99 (322)     | 94 (279)    | 0.016 |
| <b>ALT (U/L)</b>                                          | 61 (113)     | 60 (133)    | 0.014 |
| <b>Total Bilirubin (mg/dl)</b>                            | 0.8 (1.5)    | 0.8 (1.4)   | 0.014 |
| <b>Lactate (mmol/L)</b>                                   | 2.1 (2.0)    | 2.0 (1.9)   | 0.023 |
| <b>CRP (mg/L)</b>                                         | 176 (106)    | 166 (104)   | 0.103 |
| <b>Arterial pH</b>                                        | 7.35 (0.11)  | 7.36 (0.13) | 0.046 |
| <b>D-dimer (ng/ml)</b>                                    | 4795 (10146) | 3992 (9976) | 0.080 |
| <b>Ferritin (ng/ml)</b>                                   | 1843 (2884)  | 2179 (5335) | 0.078 |
| <b>Procalcitonin (ng/ml)</b>                              | 4.43 (16.88) | 2.20 (9.93) | 0.161 |
| <b>CK (U/L)</b>                                           | 817 (3549)   | . (.)       | n/a   |

Abbreviations: BMI, body mass index; CKD, chronic kidney disease; eGFR, estimated glomerular filtration rate (via CKD-EPI equation); HIV/AIDS, human immunodeficiency virus/acquired immune deficiency syndrome; ACEI, angiotensin converting enzyme inhibitor; ARB, angiotensin receptor blocker; ICU, intensive care unit; HR, heart rate; SBP, systolic blood pressure; RR, respiratory rate; HFNC, high-flow nasal cannula; MV, mechanical ventilation; NIPPV, non-invasive positive pressure ventilation; BiPAP, bilevel positive airway pressure; CPAP, continuous positive airway pressure; NRB, non-rebreather mask; P:F, partial pressure of arterial oxygenation to fraction of inspired oxygenation; ECMO, extra-corporeal membrane oxygenation; UOP, urine output; AST, aspartate aminotransferase; ALT, alanine aminotransferase; CRP, c-reactive protein; CK, creatine kinase

\* Includes patients that received supplemental oxygen by nasal cannula administration

**e-Table 6: Comparison of baseline characteristics, stratified by subphenotype, in the Discovery cohort**

|                                                              | <b>SP1</b>     | <b>SP2</b>     | <b>SP3</b>     | <b>SP4</b>     | <b>P-value</b> |
|--------------------------------------------------------------|----------------|----------------|----------------|----------------|----------------|
| <b>Patients, n (%)</b>                                       | 244<br>(11.2)  | 600<br>(27.4)  | 475<br>(21.7)  | 869<br>(39.7)  |                |
| <b>Baseline Characteristics</b>                              |                |                |                |                |                |
| <b>Age (years)</b>                                           | 67 (56;<br>75) | 63 (52;<br>72) | 65 (55;<br>74) | 60 (49;<br>68) | <0.001         |
| <b>Male</b>                                                  | 166<br>(68.0)  | 435<br>(72.5)  | 242<br>(50.9)  | 575<br>(66.2)  |                |
| <b>Race</b>                                                  |                |                |                |                |                |
| White                                                        | 69<br>(28.3)   | 192<br>(32.0)  | 159<br>(33.5)  | 335<br>(38.6)  |                |
| Black                                                        | 95<br>(38.9)   | 177<br>(29.5)  | 216<br>(45.5)  | 295<br>(33.9)  |                |
| Other                                                        | 22 (9.0)       | 53 (8.8)       | 23 (4.8)       | 63 (7.2)       |                |
| Unknown                                                      | 58<br>(23.8)   | 178<br>(29.7)  | 77<br>(16.2)   | 176<br>(20.3)  | <0.001         |
| <b>Latino Ethnicity</b>                                      | 33<br>(13.5)   | 116<br>(19.3)  | 61<br>(12.8)   | 150<br>(17.3)  | 0.018          |
| <b>BMI (kg/m<sup>2</sup>)</b>                                | 29 (25;<br>35) | 30 (27;<br>35) | 30 (26;<br>37) | 31 (27;<br>37) | 0.002          |
| <b>Diabetes</b>                                              | 126<br>(51.6)  | 218<br>(36.3)  | 253<br>(53.3)  | 316<br>(36.4)  | <0.001         |
| <b>Hypertension</b>                                          | 177<br>(72.5)  | 343<br>(57.2)  | 353<br>(74.3)  | 490<br>(56.4)  | <0.001         |
| <b>Kidney Function (eGFR,<br/>ml/min/1.73 m<sup>2</sup>)</b> |                |                |                |                | <0.001         |
| eGFR ≥ 90                                                    | 50<br>(20.5)   | 183<br>(30.5)  | 110<br>(23.2)  | 341<br>(39.2)  |                |
| eGFR 60 to < 90                                              | 59<br>(24.2)   | 216<br>(36.0)  | 128<br>(26.9)  | 386<br>(44.4)  |                |
| eGFR 30 to < 60                                              | 60<br>(24.6)   | 166<br>(27.7)  | 97<br>(20.4)   | 131<br>(15.1)  |                |
| eGFR 15 to < 30                                              | 28<br>(11.5)   | 23 (3.8)       | 48<br>(10.1)   | 5 (0.6)        |                |
| eGFR <15 or HD                                               | 47<br>(19.3)   | 12 (2.0)       | 92<br>(19.4)   | 6 (0.7)        |                |
| <b>Coronary Artery Disease</b>                               | 41<br>(16.8)   | 67<br>(11.2)   | 104<br>(21.9)  | 97<br>(11.2)   | <0.001         |
| <b>Congestive Heart Failure</b>                              | 44<br>(18.0)   | 40 (6.7)       | 92<br>(19.4)   | 51 (5.9)       | <0.001         |
| <b>Atrial Fibrillation or Flutter</b>                        | 18 (7.4)       | 39 (6.5)       | 58<br>(12.2)   | 49 (5.6)       | <0.001         |
| <b>Chronic Obstructive<br/>Pulmonary Disease</b>             | 22 (9.0)       | 35 (5.8)       | 60<br>(12.6)   | 58 (6.7)       | <0.001         |



|                                                             |                    |                     |                    |                     |        |
|-------------------------------------------------------------|--------------------|---------------------|--------------------|---------------------|--------|
| <b>Asthma</b>                                               | 10 (4.1)           | 66 (11.0)           | 46 (9.7)           | 116 (13.3)          | <0.001 |
| <b>Chronic Liver Disease</b>                                | 21 (8.6)           | 9 (1.5)             | 22 (4.6)           | 22 (2.5)            | <0.001 |
| <b>HIV/AIDS</b>                                             | 1 (0.4)            | 7 (1.2)             | 13 (2.7)           | 10 (1.2)            | 0.038  |
| <b>Active Malignancy</b>                                    | 23 (9.4)           | 22 (3.7)            | 28 (5.9)           | 29 (3.3)            | <0.001 |
| <b>Solid Organ Transplant</b>                               | 6 (2.5)            | 16 (2.7)            | 27 (5.7)           | 20 (2.3)            | 0.005  |
| <b>Bone Marrow Transplant</b>                               | 1 (0.4)            | 1 (0.2)             | 0 (0.0)            | 2 (0.2)             | 0.643  |
| <b>Blood Type A</b>                                         | 55 (22.5)          | 117 (19.5)          | 108 (22.7)         | 153 (17.6)          | 0.094  |
| <b>Smoking Status</b>                                       |                    |                     |                    |                     | <0.001 |
| Non-smoker                                                  | 120 (49.2)         | 348 (58.0)          | 243 (51.2)         | 534 (61.4)          |        |
| Current/Former                                              | 77 (31.6)          | 146 (24.3)          | 176 (37.1)         | 249 (28.7)          |        |
| Unknown                                                     | 47 (19.3)          | 106 (17.7)          | 56 (11.8)          | 86 (9.9)            |        |
| <b>Pre-admission ACEI or ARB</b>                            | 91 (37.3)          | 211 (35.2)          | 148 (31.2)         | 279 (32.1)          | 0.237  |
| <b>Pre-admission Anticoagulation</b>                        | 29 (11.9)          | 47 (7.8)            | 77 (16.2)          | 72 (8.3)            | <0.001 |
| <b>Pre-admission Immunosuppressive Medication</b>           | 30 (12.3)          | 54 (9.0)            | 75 (15.8)          | 77 (8.9)            | <0.001 |
| <b>Clinical &amp; Laboratory Data</b>                       |                    |                     |                    |                     |        |
| <b>Time from Symptom Onset to ICU Admission (days)</b>      | 6 (2;9)            | 8 (5;11)            | 6 (3;9)            | 8 (5;10)            | <0.001 |
| <b>Time from Hospital Admission to ICU Admission (days)</b> | 1 (0;4)            | 1 (0;3)             | 1 (0;3)            | 1 (0;2)             | 0.367  |
| <b>Antibiotic on ICU Day 1</b>                              | 215 (88.1)         | 498 (83.0)          | 387 (81.5)         | 675 (77.7)          | 0.001  |
| <b>Coinfection on ICU Day 1</b>                             | 87 (35.7)          | 118 (19.7)          | 154 (32.4)         | 154 (17.8)          | <0.001 |
| <b>Altered Mental Status on ICU Day 1</b>                   | 104 (42.6)         | 132 (22.0)          | 129 (27.2)         | 72 (8.3)            | <0.001 |
| <b>T<sub>max</sub> ICU Day 1 (°F)</b>                       | 99.9 (98.5; 101.6) | 100.6 (99.3; 102.0) | 99.9 (98.8; 101.1) | 101.0 (99.5; 102.4) | <0.001 |
| <b>HR<sub>max</sub> ICU Day 1</b>                           | 109 (92; 129)      | 114 (99; 128)       | 100 (86; 114)      | 102 (90; 113)       | <0.001 |
| <b>SBP<sub>min</sub> ICU Day 1 (mmHg)</b>                   | 88 (75; 103)       | 90 (80; 104)        | 98 (87; 112)       | 101 (91; 115)       | <0.001 |
| <b>RR<sub>max</sub> ICU Day 1</b>                           | 30 (26; 38)        | 33 (28; 40)         | 30 (24; 36)        | 32 (27; 39)         | <0.001 |

|                                                           |                         |                         |                         |                         |        |
|-----------------------------------------------------------|-------------------------|-------------------------|-------------------------|-------------------------|--------|
| <b>Respiratory Support &amp; Oxygenation on ICU Day 1</b> |                         |                         |                         |                         | <0.001 |
| Neither HFNC, NIPPV or MV*                                | 33<br>(13.5)            | 7 (1.2)                 | 76<br>(16.0)            | 150<br>(17.3)           |        |
| BiPAP, CPAP, HFNC or NRB                                  | 28<br>(11.5)            | 54 (9.0)                | 137<br>(28.8)           | 275<br>(31.6)           |        |
| Vent P:F > 300                                            | 39<br>(16.0)            | 112<br>(18.7)           | 92<br>(19.4)            | 104<br>(12.0)           |        |
| Vent P:F > 200 to ≤ 300                                   | 34<br>(13.9)            | 56 (9.3)                | 37 (7.8)                | 60 (6.9)                |        |
| Vent P:F > 100 to ≤ 200                                   | 57<br>(23.4)            | 183<br>(30.5)           | 67<br>(14.1)            | 179<br>(20.6)           |        |
| Vent P:F ≤ 100                                            | 49<br>(20.1)            | 182<br>(30.3)           | 65<br>(13.7)            | 101<br>(11.6)           |        |
| ECMO                                                      | 4 (1.6)                 | 6 (1.0)                 | 1 (0.2)                 | 0 (0.0)                 |        |
| <b># Vasoactive Infusions on ICU Day 1</b>                | 1 (1; 2)                | 1 (0; 1)                | 1 (0; 1)                | 0 (0; 1)                | <0.001 |
| <b>24-Hour UOP on ICU Day 1 (ml/day)</b>                  | 435<br>(123;<br>895)    | 621<br>(302;<br>1011)   | 698<br>(250;<br>1140)   | 878<br>(489;<br>1351)   | <0.001 |
| <b>White Blood Cell Count (K/mm<sup>3</sup>)</b>          | 9.6 (6.0;<br>14.2)      | 11.6<br>(9.1;<br>15.1)  | 7.2 (5.3;<br>9.8)       | 6.6 (5.2;<br>8.5)       | <0.001 |
| <b>Lymphocyte %</b>                                       | 8.7 (6.0;<br>13.6)      | 6.9 (4.5;<br>10.4)      | 10.9<br>(6.1;<br>17.3)  | 13.1<br>(9.3;<br>18.2)  | <0.001 |
| <b>Hemoglobin (g/dl)</b>                                  | 11.4<br>(9.1;<br>13.3)  | 13.0<br>(11.8;<br>14.4) | 10.7<br>(9.5;<br>12.0)  | 13.3<br>(12.2;<br>14.4) | <0.001 |
| <b>Platelet Count (K/mm<sup>3</sup>)</b>                  | 185<br>(118;<br>254)    | 244<br>(199;<br>314)    | 199<br>(149;<br>270)    | 198<br>(155;<br>248)    | <0.001 |
| <b>Creatinine (mg/dl)</b>                                 | 2.38<br>(1.28;<br>4.59) | 1.14<br>(0.82;<br>1.60) | 1.55<br>(0.88;<br>3.01) | 0.91<br>(0.75;<br>1.15) | <0.001 |
| <b>Sodium (mEq/L)</b>                                     | 138<br>(134;<br>143)    | 137<br>(133;<br>141)    | 138<br>(135;<br>141)    | 136<br>(134;<br>139)    | <0.001 |
| <b>Albumin (g/dl)</b>                                     | 2.9 (2.4;<br>3.4)       | 3.0 (2.6;<br>3.4)       | 3.2 (2.8;<br>3.6)       | 3.4 (3.1;<br>3.7)       | <0.001 |
| <b>AST (U/L)</b>                                          | 117 (67;<br>247)        | 68 (47;<br>93)          | 31 (24;<br>44)          | 51 (38;<br>75)          | <0.001 |
| <b>ALT (U/L)</b>                                          | 59 (37;<br>142)         | 48 (32;<br>71)          | 19 (13;<br>25)          | 35 (25;<br>54)          | <0.001 |
| <b>Total Bilirubin (mg/dl)</b>                            | 0.7 (0.4;<br>1.2)       | 0.7 (0.5;<br>1.0)       | 0.4 (0.3;<br>0.6)       | 0.5 (0.4;<br>0.8)       | <0.001 |
| <b>Lactate (mmol/L)</b>                                   | 2.3 (1.4;<br>4.0)       | 1.9 (1.3;<br>2.8)       | 1.4 (1.0;<br>1.8)       | 1.3 (1.0;<br>1.7)       | <0.001 |



|                              |                          |                         |                         |                         |        |
|------------------------------|--------------------------|-------------------------|-------------------------|-------------------------|--------|
| <b>CRP (mg/L)</b>            | 160 (73;<br>267)         | 240<br>(171;<br>300)    | 120 (65;<br>201)        | 134 (80;<br>189)        | <0.001 |
| <b>Arterial pH</b>           | 7.29<br>(7.20;<br>7.40)  | 7.33<br>(7.26;<br>7.40) | 7.38<br>(7.32;<br>7.43) | 7.41<br>(7.36;<br>7.45) | <0.001 |
| <b>D-dimer (ng/ml)</b>       | 3115<br>(1100;<br>11575) | 2237<br>(1130;<br>8235) | 1300<br>(600;<br>2297)  | 778<br>(510;<br>1168)   | <0.001 |
| <b>Ferritin (ng/ml)</b>      | 2097<br>(694;<br>4717)   | 1404<br>(813;<br>2509)  | 543<br>(233;<br>1260)   | 862<br>(452;<br>1430)   | <0.001 |
| <b>Procalcitonin (ng/ml)</b> | 1.72<br>(0.52;<br>7.98)  | 1.06<br>(0.45;<br>3.05) | 0.40<br>(0.14;<br>1.06) | 0.19<br>(0.11;<br>0.34) | <0.001 |
| <b>CK (U/L)</b>              | 852<br>(262;<br>1760)    | 224<br>(119;<br>751)    | 126 (63;<br>323)        | 185 (98;<br>448)        | <0.001 |

Data are shown as n (%) for categorical variables and median (IQR) for continuous variables. Differences between cohorts were compared using the Kruskal-Wallis test and chi-squared test, as appropriate.

Abbreviations: BMI, body mass index; CKD, chronic kidney disease; eGFR, estimated glomerular filtration rate (via CKD-EPI equation); HIV/AIDS, human immunodeficiency virus/acquired immune deficiency syndrome; ACEI, angiotensin converting enzyme inhibitor; ARB, angiotensin receptor blocker; ICU, intensive care unit; HR, heart rate; SBP, systolic blood pressure; RR, respiratory rate; HFNC, high-flow nasal cannula; MV, mechanical ventilation; NIPPV, non-invasive positive pressure ventilation; BiPAP, bilevel positive airway pressure; NRB, non-rebreather mask; CPAP, continuous positive airway pressure; P:F, partial pressure of arterial oxygenation to fraction of inspired oxygenation; ECMO, extra-corporeal membrane oxygenation; UOP, urine output; AST, aspartate aminotransferase; ALT, alanine aminotransferase; CRP, C-reactive protein.

\*Includes patients that received supplemental oxygen by nasal cannula administration.

**e-Table 7: Comparison of baseline characteristics, stratified by subphenotype, in the Replication cohort**

|                                                              | <b>SP1</b>     | <b>SP2</b>     | <b>SP3</b>     | <b>SP4</b>     | <b>P-value</b> |
|--------------------------------------------------------------|----------------|----------------|----------------|----------------|----------------|
| <b>Patients, n (%)</b>                                       | 145<br>(13.0)  | 360<br>(32.4)  | 251<br>(22.6)  | 356<br>(32.0)  |                |
| <b>Baseline Characteristics</b>                              |                |                |                |                |                |
| <b>Age (years)</b>                                           | 62<br>(52; 70) | 62<br>(52; 72) | 66<br>(56; 75) | 60<br>(49; 68) | <0.001         |
| <b>Male</b>                                                  | 99<br>(68.3)   | 260<br>(72.2)  | 128<br>(51.0)  | 215<br>(60.4)  | <0.001         |
| <b>Race</b>                                                  |                |                |                |                | <0.001         |
| White                                                        | 48<br>(33.1)   | 148<br>(41.1)  | 113<br>(45.0)  | 157<br>(44.1)  |                |
| Black                                                        | 44<br>(30.3)   | 62<br>(17.2)   | 82<br>(32.7)   | 72<br>(20.2)   |                |
| Other                                                        | 14 (9.7)       | 35 (9.7)       | 10 (4.0)       | 35 (9.8)       |                |
| Unknown                                                      | 39<br>(26.9)   | 115<br>(31.9)  | 46<br>(18.3)   | 92<br>(25.8)   |                |
| <b>Latino Ethnicity</b>                                      | 35<br>(24.1)   | 114<br>(31.7)  | 63<br>(25.1)   | 106<br>(29.8)  | 0.186          |
| <b>BMI (kg/m<sup>2</sup>)</b>                                | 30 (26;<br>35) | 30 (27;<br>35) | 30 (26;<br>35) | 31 (28;<br>36) | 0.004          |
| <b>Diabetes</b>                                              | 58<br>(40.0)   | 114<br>(31.7)  | 147<br>(58.6)  | 126<br>(35.4)  | <0.001         |
| <b>Hypertension</b>                                          | 89<br>(61.4)   | 198<br>(55.0)  | 194<br>(77.3)  | 192<br>(53.9)  | <0.001         |
| <b>Kidney Function (eGFR,<br/>ml/min/1.73 m<sup>2</sup>)</b> |                |                |                |                | <0.001         |
| eGFR ≥ 90                                                    | 35<br>(24.1)   | 120<br>(33.3)  | 44<br>(17.5)   | 166<br>(46.6)  |                |
| eGFR 60 to < 90                                              | 40<br>(27.6)   | 151<br>(41.9)  | 62<br>(24.7)   | 135<br>(37.9)  |                |
| eGFR 30 to < 60                                              | 34<br>(23.4)   | 79<br>(21.9)   | 66<br>(26.3)   | 50<br>(14.0)   |                |
| eGFR 15 to < 30                                              | 17<br>(11.7)   | 9 (2.5)        | 27<br>(10.8)   | 3 (0.8)        |                |
| eGFR < 15 or HD                                              | 19<br>(13.1)   | 1 (0.3)        | 52<br>(20.7)   | 2 (0.6)        |                |
| <b>Coronary Artery Disease</b>                               | 20<br>(13.8)   | 26 (7.2)       | 61<br>(24.3)   | 41<br>(11.5)   | <0.001         |
| <b>Congestive Heart Failure</b>                              | 19<br>(13.1)   | 17 (4.7)       | 53<br>(21.1)   | 12 (3.4)       | <0.001         |
| <b>Atrial Fibrillation or Flutter</b>                        | 12 (8.3)       | 21 (5.8)       | 26<br>(10.4)   | 13 (3.7)       | 0.008          |
| <b>Chronic Obstructive<br/>Pulmonary Disease</b>             | 17<br>(11.7)   | 20 (5.6)       | 31<br>(12.4)   | 35 (9.8)       | 0.019          |



|                                                             |                     |                     |                    |                     |        |
|-------------------------------------------------------------|---------------------|---------------------|--------------------|---------------------|--------|
| <b>Asthma</b>                                               | 14 (9.7)            | 36 (10.0)           | 21 (8.4)           | 38 (10.7)           | 0.823  |
| <b>Chronic Liver Disease</b>                                | 7 (4.8)             | 10 (2.8)            | 11 (4.4)           | 10 (2.8)            | 0.489  |
| <b>HIV/AIDS</b>                                             | 2 (1.4)             | 6 (1.7)             | 3 (1.2)            | 6 (1.7)             | 0.958  |
| <b>Active Malignancy</b>                                    | 12 (8.3)            | 13 (3.6)            | 18 (7.2)           | 17 (4.8)            | 0.093  |
| <b>Solid Organ Transplant</b>                               | 4 (2.8)             | 3 (0.8)             | 22 (8.8)           | 8 (2.2)             | <0.001 |
| <b>Bone Marrow Transplant</b>                               | 0 (0.0)             | 2 (0.6)             | 0 (0.0)            | 2 (0.6)             | 0.528  |
| <b>Blood Type A</b>                                         | 35 (24.1)           | 77 (21.4)           | 70 (27.9)          | 68 (19.1)           | 0.071  |
| <b>Smoking Status</b>                                       |                     |                     |                    |                     | <0.001 |
| Non-smoker                                                  | 64 (44.1)           | 204 (56.7)          | 140 (55.8)         | 202 (56.7)          |        |
| Current/Former                                              | 43 (29.7)           | 91 (25.3)           | 84 (33.5)          | 118 (33.1)          |        |
| Unknown                                                     | 38 (26.2)           | 65 (18.1)           | 27 (10.8)          | 36 (10.1)           |        |
| <b>Pre-admission ACEI or ARB</b>                            | 47 (32.4)           | 120 (33.3)          | 110 (43.8)         | 117 (32.9)          | 0.018  |
| <b>Pre-admission Anticoagulation</b>                        | 21 (14.5)           | 18 (5.0)            | 41 (16.3)          | 18 (5.1)            | <0.001 |
| <b>Pre-admission Immunosuppressive Medication</b>           | 15 (10.3)           | 21 (5.8)            | 38 (15.1)          | 32 (9.0)            | 0.002  |
| <b>Clinical &amp; Laboratory Data</b>                       |                     |                     |                    |                     |        |
| <b>Time from Symptom Onset to ICU Admission (days)</b>      | 6 (3;10)            | 7 (5;10)            | 6 (2;10)           | 7 (5;10)            | 0.001  |
| <b>Time from Hospital Admission to ICU Admission (days)</b> | 1 (0;3)             | 1 (0;3)             | 1 (0;3)            | 1 (0;2)             | 0.292  |
| <b>Antibiotic on ICU Day 1</b>                              | 121 (83.5)          | 287 (79.7)          | 194 (77.3)         | 273 (76.7)          | 0.343  |
| <b>Coinfection on ICU Day 1</b>                             | 33 (22.8)           | 69 (19.2)           | 65 (25.9)          | 46 (12.9)           | 0.001  |
| <b>Altered Mental Status on ICU Day 1</b>                   | 65 (44.8)           | 121 (33.6)          | 97 (38.8)          | 37 (10.4)           | <0.001 |
| <b>T<sub>max</sub> ICU Day 1 (°F)</b>                       | 100.0 (98.8; 101.7) | 101.0 (99.3; 102.3) | 99.3 (98.4; 101.0) | 100.6 (99.3; 101.9) | <0.001 |
| <b>HR<sub>max</sub> ICU Day 1</b>                           | 116 (95; 136)       | 108 (96; 122)       | 99 (86; 117)       | 100 (87; 110)       | <0.001 |
| <b>SBP<sub>min</sub> ICU Day 1 (mmHg)</b>                   | 90 (78; 104)        | 93 (84; 104)        | 96 (85; 112)       | 105 (94; 115)       | <0.001 |
| <b>RR<sub>max</sub> ICU Day 1</b>                           | 30 (24; 34)         | 32 (26; 39)         | 28 (22; 35)        | 31 (26; 37)         | <0.001 |

|                                                           |                   |                   |                   |                   |        |
|-----------------------------------------------------------|-------------------|-------------------|-------------------|-------------------|--------|
| <b>Respiratory Support &amp; Oxygenation on ICU Day 1</b> |                   |                   |                   |                   | <0.001 |
| Neither HFNC, NIPPV or MV*                                | 10 (6.9)          | 13 (3.6)          | 44 (17.5)         | 88 (24.7)         |        |
| BiPAP, CPAP, HFNC or NRB                                  | 14 (9.7)          | 39 (10.8)         | 42 (16.7)         | 131 (36.8)        |        |
| Vent P:F > 300                                            | 18 (12.4)         | 65 (18.1)         | 52 (20.7)         | 40 (11.2)         |        |
| Vent P:F > 200 to ≤ 300                                   | 15 (10.3)         | 44 (12.2)         | 30 (12.0)         | 15 (4.2)          |        |
| Vent P:F > 100 to ≤ 200                                   | 42 (29.0)         | 96 (26.7)         | 52 (20.7)         | 52 (14.6)         |        |
| Vent P:F ≤ 100                                            | 41 (28.3)         | 102 (28.3)        | 30 (12.0)         | 30 (8.4)          |        |
| ECMO                                                      | 5 (3.4)           | 1 (0.3)           | 1 (0.4)           | 0 (0.0)           |        |
| <b># Vasoactive Infusions on ICU Day 1</b>                | 1 (1; 2)          | 1 (0; 1)          | 1 (0; 1)          | 0 (0; 1)          | <0.001 |
| <b>24-Hour UOP on ICU Day 1 (ml/day)</b>                  | 400 (150; 905)    | 715 (350; 1288)   | 675 (330; 1250)   | 960 (610; 1650)   | <0.001 |
| <b>White Blood Cell Count (K/mm<sup>3</sup>)</b>          | 10.5 (7.4; 16.5)  | 10.5 (8.1; 13.6)  | 8.5 (6.0; 12.2)   | 6.3 (4.9; 7.7)    | <0.001 |
| <b>Lymphocyte %</b>                                       | 8.0 (5.0; 14.1)   | 6.8 (4.4; 10.0)   | 8.0 (4.7; 13.4)   | 14.1 (10.3; 19.7) | <0.001 |
| <b>Hemoglobin (g/dl)</b>                                  | 11.5 (9.5; 13.4)  | 13.1 (11.9; 14.2) | 10.5 (9.0; 12.3)  | 13.3 (12.2; 14.2) | <0.001 |
| <b>Platelet Count (K/mm<sup>3</sup>)</b>                  | 200 (120; 268)    | 238 (187; 299)    | 217 (158; 283)    | 202 (161; 246)    | <0.001 |
| <b>Creatinine (mg/dl)</b>                                 | 2.20 (1.40; 3.73) | 1.00 (0.81; 1.39) | 1.81 (0.91; 4.06) | 0.83 (0.72; 1.07) | <0.001 |
| <b>Sodium (mEq/L)</b>                                     | 137 (133; 142)    | 136 (133; 139)    | 138 (134; 142)    | 136 (134; 138)    | <0.001 |
| <b>Albumin (g/dl)</b>                                     | 2.9 (2.4; 3.3)    | 3.2 (2.9; 3.5)    | 3.0 (2.7; 3.5)    | 3.4 (3.1; 3.7)    | <0.001 |
| <b>AST (U/L)</b>                                          | 119 (77; 252)     | 64 (47; 96)       | 35 (24; 48)       | 49 (35; 71)       | <0.001 |
| <b>ALT (U/L)</b>                                          | 80 (41; 163)      | 46 (32; 70)       | 21 (15; 29)       | 36 (23; 55)       | <0.001 |
| <b>Total Bilirubin (mg/dl)</b>                            | 0.8 (0.4; 1.4)    | 0.7 (0.5; 1.0)    | 0.4 (0.3; 0.6)    | 0.5 (0.4; 0.7)    | <0.001 |
| <b>Lactate (mmol/L)</b>                                   | 2.7 (1.4; 4.2)    | 1.7 (1.2; 2.2)    | 1.5 (1.0; 2.2)    | 1.2 (1.0; 1.6)    | <0.001 |

|                              |                          |                         |                         |                         |        |
|------------------------------|--------------------------|-------------------------|-------------------------|-------------------------|--------|
| <b>CRP (mg/L)</b>            | 186 (99;<br>273)         | 195<br>(138;<br>260)    | 108 (43;<br>222)        | 96 (56;<br>143)         | <0.001 |
| <b>Arterial pH</b>           | 7.28<br>(7.18;<br>7.37)  | 7.36<br>(7.31;<br>7.42) | 7.34<br>(7.26;<br>7.40) | 7.43<br>(7.39;<br>7.46) | <0.001 |
| <b>D-dimer (ng/ml)</b>       | 5610<br>(2164;<br>20000) | 2073<br>(1048;<br>7726) | 1973<br>(1095;<br>4880) | 880<br>(565;<br>1290)   | <0.001 |
| <b>Ferritin (ng/ml)</b>      | 3107<br>(1843;<br>6273)  | 1377<br>(765;<br>2418)  | 744<br>(232;<br>1820)   | 821<br>(451;<br>1497)   | <0.001 |
| <b>Procalcitonin (ng/ml)</b> | 6.78<br>(2.38;<br>40.67) | 0.76<br>(0.30;<br>1.90) | 0.54<br>(0.23;<br>2.01) | 0.12<br>(0.07;<br>0.25) | <0.001 |
| <b>CK (U/L)</b>              | 389<br>(160;<br>1324)    | 280<br>(123;<br>689)    | 140 (63;<br>378)        | 142 (78;<br>275)        | <0.001 |

Data are shown as n (%) for categorical variables and median (IQR) for continuous variables. Differences between cohorts were compared using the Kruskal-Wallis test and chi-squared test, as appropriate.

Abbreviations: BMI, body mass index; CKD, chronic kidney disease; eGFR, estimated glomerular filtration rate (via CKD-EPI equation); HIV/AIDS, human immunodeficiency virus/acquired immune deficiency syndrome; ACEI, angiotensin converting enzyme inhibitor; ARB, angiotensin receptor blocker; ICU, intensive care unit; HR, heart rate; SBP, systolic blood pressure; RR, respiratory rate; HFNC, high-flow nasal cannula; MV, mechanical ventilation; NIPPV, non-invasive positive pressure ventilation; BiPAP, bilevel positive airway pressure; CPAP, continuous positive airway pressure; NRB, non-rebreather mask; P:F, partial pressure of arterial oxygenation to fraction of inspired oxygenation; ECMO, extra-corporeal membrane oxygenation; UOP, urine output; AST, aspartate aminotransferase; ALT, alanine aminotransferase; CRP, c-reactive protein.

\* Includes patients that received supplemental oxygen by nasal cannula administration.

**e-Table 8: Classification performance of a limited variable multinomial model using primary latent class analysis-assigned subphenotype as the outcome (Discovery cohort)**

| LCA-assigned subphenotypes | Model-predicted subphenotype* |     |     |     | Total | % Accuracy |
|----------------------------|-------------------------------|-----|-----|-----|-------|------------|
|                            | SP1                           | SP2 | SP3 | SP4 |       |            |
| SP1                        | 161                           | 38  | 24  | 21  | 244   | 66.0       |
| SP2                        | 149                           | 346 | 22  | 83  | 600   | 57.8       |
| SP3                        | 150                           | 24  | 242 | 59  | 475   | 50.9       |
| SP4                        | 253                           | 63  | 32  | 521 | 869   | 60.0       |

\* A multinomial logistic regression model was constructed by using a limited set of commonly available clinical and laboratory explanatory variables and considering latent class analysis (LCA)-assigned COVID-19 subphenotype as the model outcome. The following explanatory variables were included based on both limited missingness and ability to distinguish subphenotypes in the primary LCA: white blood cell count, hemoglobin, platelet count, serum creatinine, albumin, AST, total bilirubin, maximum temperature, minimum systolic blood pressure and maximum respiratory rate. Class-defining variables with >20% missingness were excluded from consideration for use in the multinomial model.

**e-Table 9: Restricted mean survival time analysis in the Discovery and Replication cohort**

The restricted mean survival time (RMST) is equivalent to the average duration of survival during the follow-up period. Graphically, RMST is equivalent to the area under the Kaplan-Meier curve from the start of follow-up to a specified time point (ex. 28 days). Similar to a risk calculation, RMST estimates of two groups can be compared by computing the absolute difference or the ratio. Here, all RMSTs were estimated at 28 days and corresponding 95% confidence intervals are reported.

| Discovery Cohort        |                     |                     |                     |                     |
|-------------------------|---------------------|---------------------|---------------------|---------------------|
|                         | SP1                 | SP2                 | SP3                 | SP4                 |
| RMST (days)             | 17.3<br>(16.0-18.7) | 21.3<br>(20.5-22.0) | 22.4<br>(21.5-23.2) | 24.7<br>(24.2-25.2) |
| RMST Difference (days)* | -7.4<br>(-8.9--6.0) | -3.5<br>(-4.4--2.6) | -2.4<br>(-3.4--1.4) | 0 (ref)             |
| RMST Ratio*             | 0.70<br>(0.65-0.76) | 0.86<br>(0.83-0.90) | 0.90<br>(0.87-0.94) | 1 (ref)             |
| *Compared to SP4        |                     |                     |                     |                     |

| Replication Cohort      |                     |                     |                     |                     |
|-------------------------|---------------------|---------------------|---------------------|---------------------|
|                         | SP1                 | SP2                 | SP3                 | SP4                 |
| RMST (days)             | 15.2<br>(13.5-16.9) | 19.2<br>(18.3-20.2) | 19.8<br>(18.7-20.9) | 23.0<br>(22.3-23.7) |
| RMST Difference (days)* | -7.8<br>(-9.7--6.0) | -3.8<br>(-4.9--2.6) | -3.2<br>(-4.5--1.9) | 0 (ref)             |
| RMST Ratio*             | 0.66<br>(0.59-0.74) | 0.84<br>(0.79-0.89) | 0.86<br>(0.81-0.92) | 1 (ref)             |
| *Compared to SP4        |                     |                     |                     |                     |

**e-Table 10: Adjusted pairwise mortality comparison in the Discovery and Replication cohort**

| Pairwise Comparison |                  |                  |
|---------------------|------------------|------------------|
|                     | Discovery        | Replication      |
| SP1 vs. SP2         | 1.29 (1.08-1.53) | 1.20 (0.96-1.49) |
| SP1 vs. SP3         | 1.19 (1.01-1.42) | 1.10 (0.90-1.34) |
| SP1 vs. SP4         | 1.63 (1.28-2.09) | 1.94 (1.40-2.68) |
| SP2 vs. SP3         | 1.00 (0.85-1.18) | 0.92 (0.76-1.13) |
| SP2 vs. SP4         | 1.47 (1.20-1.79) | 1.24 (0.95-1.60) |
| SP3 vs. SP4         | 1.28 (1.03-1.59) | 1.32 (1.01-1.73) |

\*Adjusted for: age, sex, race and ethnicity, hypertension, diabetes, chronic obstructive pulmonary disease, end-stage kidney disease, active malignancy, chronic liver disease, illness severity and organ dysfunction on ICU day 1 (respiratory support and oxygenation, platelet count, altered mental status, and creatinine), hospital ICU bed capacity, and U.S. region.

**e-Table 11: Unadjusted and adjusted hazard ratios for clinical outcomes in the Discovery and Replication cohort**

Cox proportional hazards regression estimates with 95% confidence intervals. ARDS hazard adjusted for age, BMI, blood type A, coinfection at ICU admission. AKI hazard adjusted for age, BMI, baseline eGFR, diabetes, hypertension, coinfection at ICU admission. Thrombosis hazard adjusted for age, BMI, CAD, COPD, CHF, eGFR, active malignancy, coinfection at ICU admission. Infection hazard adjusted for age, diabetes, immunosuppression medication, coinfection at ICU admission. New onset CHF hazard adjusted for age, BMI, diabetes, hypertension, CHF, CAD, coinfection at ICU admission. For all models, SP4 was the reference group and patients were censored at time of death, ICU discharge or ICU day 14.

| <b>ARDS*</b>                                                                                  |                   |                  |                   |                  |                   |                  |                   |                 |
|-----------------------------------------------------------------------------------------------|-------------------|------------------|-------------------|------------------|-------------------|------------------|-------------------|-----------------|
|                                                                                               | <b>SP1</b>        |                  | <b>SP2</b>        |                  | <b>SP3</b>        |                  | <b>SP4</b>        |                 |
|                                                                                               | <b>Unadjusted</b> | <b>Adjusted</b>  | <b>Unadjusted</b> | <b>Adjusted</b>  | <b>Unadjusted</b> | <b>Adjusted</b>  | <b>Unadjusted</b> | <b>Adjusted</b> |
| <b>Discovery</b>                                                                              | 1.03 (0.90-1.20)  | 1.07 (0.91-1.26) | 1.63 (1.50-1.77)  | 1.63 (1.49-1.78) | 0.99 (0.88-1.10)  | 1.00 (0.88-1.13) | 1 (ref)           | 1 (ref)         |
| <b>Replication</b>                                                                            | 1.42 (1.19-1.69)  | 1.41 (1.17-1.69) | 1.55 (1.37-1.77)  | 1.53 (1.35-1.75) | 1.11 (0.95-1.30)  | 1.06 (0.90-1.26) | 1 (ref)           | 1 (ref)         |
| *Adjusted for: age, BMI, blood type A, coinfection at ICU admission                           |                   |                  |                   |                  |                   |                  |                   |                 |
| <b>Thrombosis†</b>                                                                            |                   |                  |                   |                  |                   |                  |                   |                 |
|                                                                                               | <b>SP1</b>        |                  | <b>SP2</b>        |                  | <b>SP3</b>        |                  | <b>SP4</b>        |                 |
|                                                                                               | <b>Unadjusted</b> | <b>Adjusted</b>  | <b>Unadjusted</b> | <b>Adjusted</b>  | <b>Unadjusted</b> | <b>Adjusted</b>  | <b>Unadjusted</b> | <b>Adjusted</b> |
| <b>Discovery</b>                                                                              | 2.12 (1.36-3.29)  | 2.02 (1.23-3.32) | 2.03 (1.47-2.81)  | 1.96 (1.40-2.73) | 0.93 (0.60-1.43)  | 0.77 (0.46-1.29) | 1 (ref)           | 1 (ref)         |
| <b>Replication</b>                                                                            | 1.76 (0.99-3.13)  | 2.10 (1.13-3.88) | 2.06 (1.37-3.11)  | 2.12 (1.39-3.23) | 1.43 (0.88-2.32)  | 1.69 (0.97-2.94) | 1 (ref)           | 1 (ref)         |
| †Adjusted for: age, BMI, CAD, COPD, CHF, CKD, active malignancy, coinfection at ICU admission |                   |                  |                   |                  |                   |                  |                   |                 |
| <b>AKI‡</b>                                                                                   |                   |                  |                   |                  |                   |                  |                   |                 |
|                                                                                               | <b>SP1</b>        |                  | <b>SP2</b>        |                  | <b>SP3</b>        |                  | <b>SP4</b>        |                 |
|                                                                                               | <b>Unadjusted</b> | <b>Adjusted</b>  | <b>Unadjusted</b> | <b>Adjusted</b>  | <b>Unadjusted</b> | <b>Adjusted</b>  | <b>Unadjusted</b> | <b>Adjusted</b> |
| <b>Discovery§</b>                                                                             | 3.00 (2.48-3.63)  | 2.99 (2.44-3.68) | 1.89 (1.65-2.16)  | 2.03 (1.76-2.34) | 1.56 (1.33-1.83)  | 1.43 (1.20-1.70) | 1 (ref)           | 1 (ref)         |
| <b>Replication  </b>                                                                          | 3.88 (3.01-5.00)  | 4.20 (3.19-5.52) | 2.05 (1.67-2.51)  | 2.21 (1.80-2.71) | 2.50 (1.99-3.15)  | 2.25 (1.76-2.87) | 1 (ref)           | 1 (ref)         |
| ‡Adjusted for: age, BMI, CKD, diabetes, hypertension, coinfection at ICU admission            |                   |                  |                   |                  |                   |                  |                   |                 |
| §N=117 with baseline ESRD excluded from Discovery Cohort analysis                             |                   |                  |                   |                  |                   |                  |                   |                 |
| N=50 with baseline ESRD excluded from Replication Cohort analysis                             |                   |                  |                   |                  |                   |                  |                   |                 |



# CHEST<sup>®</sup> Online Supplement

| <b>New Infection**</b> |                   |                  |                   |                  |                   |                  |                   |                 |
|------------------------|-------------------|------------------|-------------------|------------------|-------------------|------------------|-------------------|-----------------|
|                        | <b>SP1</b>        |                  | <b>SP2</b>        |                  | <b>SP3</b>        |                  | <b>SP4</b>        |                 |
|                        | <b>Unadjusted</b> | <b>Adjusted</b>  | <b>Unadjusted</b> | <b>Adjusted</b>  | <b>Unadjusted</b> | <b>Adjusted</b>  | <b>Unadjusted</b> | <b>Adjusted</b> |
| <b>Discovery</b>       | 1.50 (1.16-1.94)  | 1.25 (0.96-1.63) | 1.41 (1.18-1.68)  | 1.39 (1.16-1.67) | 1.14 (0.93-1.40)  | 0.98 (0.79-1.21) | 1 (ref)           | 1 (ref)         |
| <b>Replication</b>     | 2.02 (1.43-2.85)  | 1.98 (1.40-2.79) | 1.51 (1.16-1.96)  | 1.42 (1.09-1.86) | 1.38 (1.02-1.86)  | 1.23 (0.90-1.67) | 1 (ref)           | 1 (ref)         |

\*\*Adjusted for: age, diabetes, pre-admission immunosuppressive medication, coinfection present at ICU admission

| <b>New Onset CHF††</b> |                   |                  |                   |                  |                   |                  |                   |                 |
|------------------------|-------------------|------------------|-------------------|------------------|-------------------|------------------|-------------------|-----------------|
|                        | <b>SP1</b>        |                  | <b>SP2</b>        |                  | <b>SP3</b>        |                  | <b>SP4</b>        |                 |
|                        | <b>Unadjusted</b> | <b>Adjusted</b>  | <b>Unadjusted</b> | <b>Adjusted</b>  | <b>Unadjusted</b> | <b>Adjusted</b>  | <b>Unadjusted</b> | <b>Adjusted</b> |
| <b>Discovery‡‡</b>     | 2.96 (1.47-5.92)  | 2.33 (1.01-5.39) | 2.47 (1.42-4.32)  | 2.32 (1.28-4.22) | 0.62 (0.25-1.54)  | 0.71 (0.28-1.81) | 1 (ref)           | 1 (ref)         |
| <b>Replication§§</b>   | 4.25 (1.65-11.00) | 2.98 (1.07-8.26) | 2.54 (1.06-6.09)  | 2.40 (1.02-5.68) | 2.35 (0.90-6.11)  | 1.47 (0.53-4.11) | 1 (ref)           | 1 (ref)         |

††Adjusted for: age, BMI, diabetes, hypertension, CHF, CAD, coinfection at ICU admission

‡‡N=192 with baseline CHF excluded from Discovery Cohort analysis

§§N=60 with baseline CHF excluded from Replication Cohort analysis



**e-Table 12: Treatment Exposure Across Subphenotypes**

| Treatment Exposure (%)   |      |      |      |      |         |
|--------------------------|------|------|------|------|---------|
|                          | SP1  | SP2  | SP3  | SP4  | P-value |
| <b>Corticosteroids*</b>  |      |      |      |      |         |
| <b>Discovery</b>         | 39.8 | 45.3 | 30.5 | 32.5 | <0.001  |
| <b>Replication</b>       | 49.0 | 49.2 | 46.2 | 28.9 | <0.001  |
| <b>Anti-IL6 Therapy*</b> |      |      |      |      |         |
| <b>Discovery</b>         | 9.4  | 22.2 | 12.4 | 18.1 | <0.001  |
| <b>Replication</b>       | 11.7 | 20.3 | 12.8 | 19.4 | 0.017   |

\* Defined as received treatment at any time from ICU day 1-14

**e-Table 13: Interaction between subphenotype and common COVID-19 therapies, in the Discovery and Replication cohorts**

| Adjusted Relative Risk of Mortality |                     |                     |                     |                     |                         |
|-------------------------------------|---------------------|---------------------|---------------------|---------------------|-------------------------|
|                                     | SP1                 | SP2                 | SP3                 | SP4                 | P-value for Interaction |
| <b>Corticosteroids*</b>             |                     |                     |                     |                     |                         |
| <b>Discovery</b>                    | 1.21<br>(0.97-1.51) | 1.24<br>(1.01-1.52) | 1.55<br>(1.20-2.02) | 1.72<br>(1.27-2.32) | 0.376                   |
| <b>Replication</b>                  | 1.13<br>(0.79-1.62) | 0.81<br>(0.62-1.05) | 1.16<br>(0.86-1.56) | 1.40<br>(0.90-2.18) | 0.452                   |
| <b>Anti-IL6 Therapy*</b>            |                     |                     |                     |                     |                         |
| <b>Discovery</b>                    | 0.92<br>(0.66-1.28) | 0.90<br>(0.68-1.19) | 0.90<br>(0.49-1.62) | 1.41<br>(0.98-2.01) | 0.745                   |
| <b>Replication</b>                  | 1.04<br>(0.63-1.71) | 0.71<br>(0.47-1.09) | 0.80<br>(0.48-1.33) | 1.35<br>(0.88-2.08) | 0.965                   |
| <b>Antimicrobial Therapy†</b>       |                     |                     |                     |                     |                         |
| <b>Discovery</b>                    | 1.16<br>(0.78-1.74) | 0.93<br>(0.72-1.22) | 1.43<br>(0.94-2.16) | 1.36<br>(0.94-1.98) | 0.436                   |
| <b>Replication</b>                  | 0.85<br>(0.62-1.17) | 0.90<br>(0.69-1.17) | 0.99<br>(1.01-1.03) | 0.80<br>(0.51-1.24) | 0.999                   |

Within subphenotype associations with mortality are shown as relative risks (95% confidence intervals) with the non-treated group serving as control. Models adjusted for: age, sex, race and ethnicity, hypertension, diabetes, chronic obstructive pulmonary disease, end-stage kidney disease, active malignancy, chronic liver disease, illness severity and organ dysfunction on ICU day 1 (respiratory support and oxygenation, platelet count, altered mental status, and creatinine), hospital ICU bed capacity, and U.S. region. P-value determined using likelihood ratio test comparing a multivariable model including the treatment (ex. corticosteroids) with a multivariable model including the treatment with an interaction term.

\* Defined as received treatment at any time from ICU day 1-14

† Defined as received treatment on ICU day 1

**e-Figure 1: Study population flow diagram**

A total of 80 U.S. centers were approached to participate in the initial STOP-COVID study. 11 centers declined to participate or did not respond to the inquiry. Of the remaining 69 centers, two centers were unable to obtain Institutional Review Board protocol prior to initiation of our study.

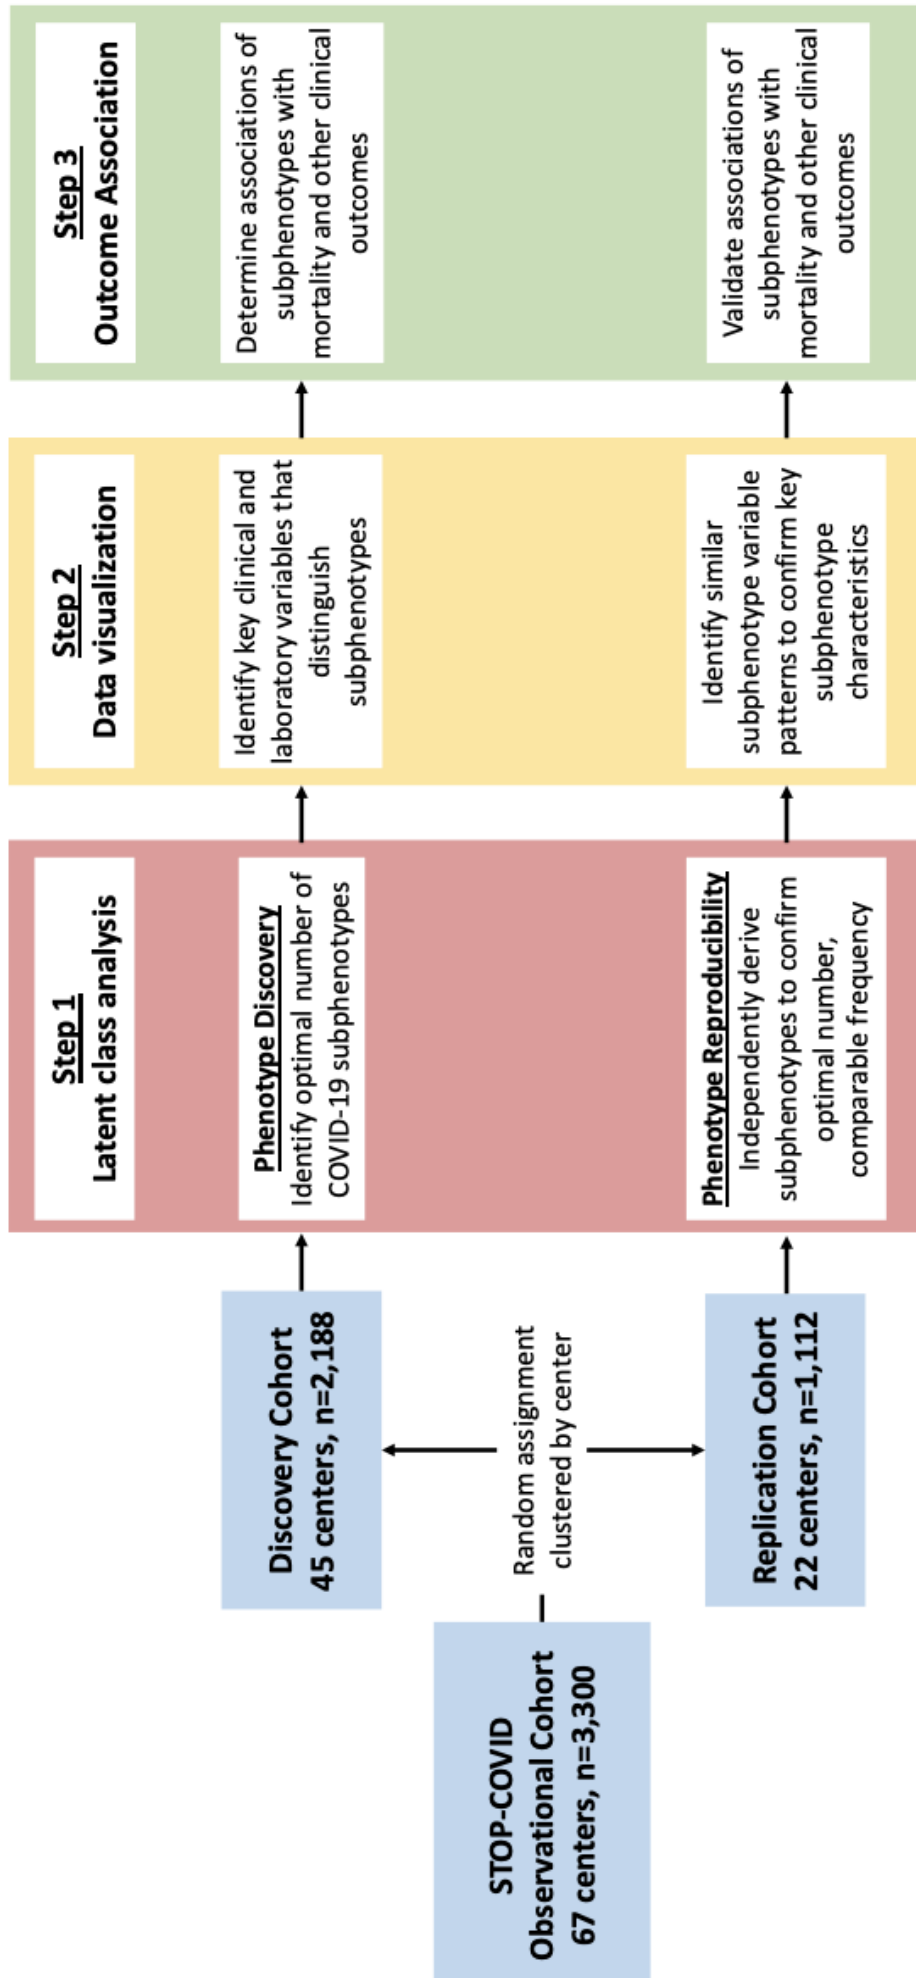

**e-Figure 2: Probabilities of assignment to each subphenotype grouped by actual phenotype assignment.**

Latent class analysis models in both Discovery and Replication cohorts generated probabilities of membership in each subphenotype for each patient. Each patient was then assigned to the subphenotype for which they had the highest probability of membership. Each panel (A-H) displays box plots summarizing model-determined probabilities of membership in a given phenotype grouped by actual subphenotype assignment. Boxes show interquartile range of probabilities, with median designated by the center line and outliers shown as individual data points. The gray dashed lines delineate patients with 45-55% probability of subphenotype membership, a range that implies greater uncertainty about membership versus non-membership. Total percent of patients in this uncertain probability range is noted in the right margin of each graph.

**Discovery Cohort**

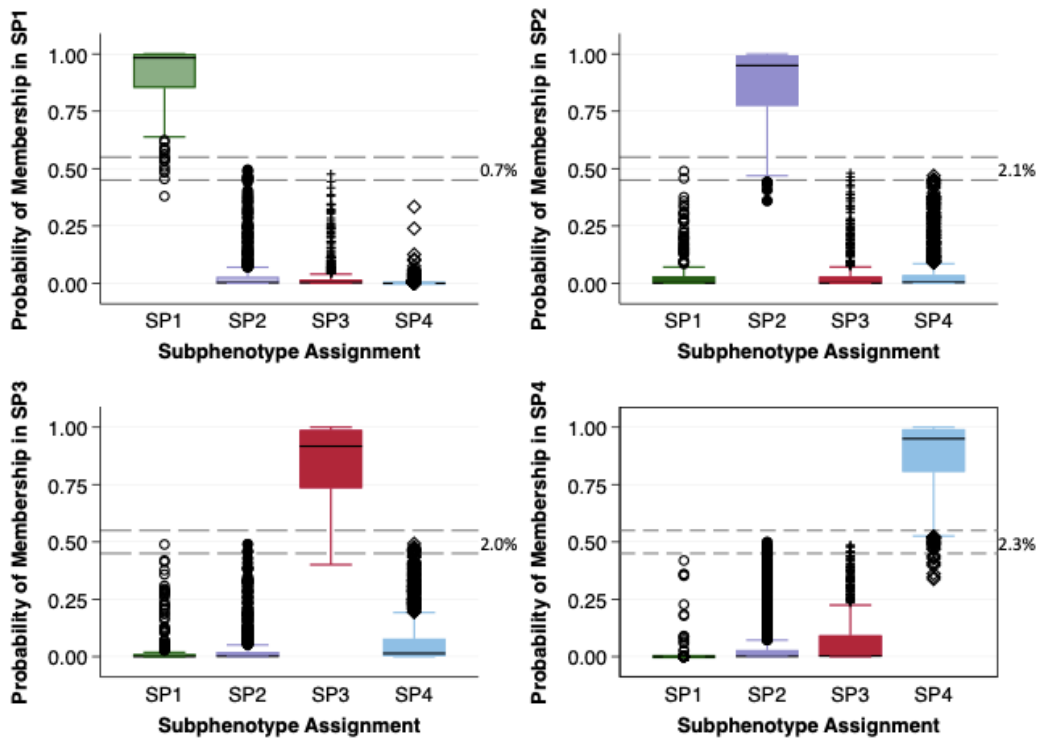

**Replication Cohort**

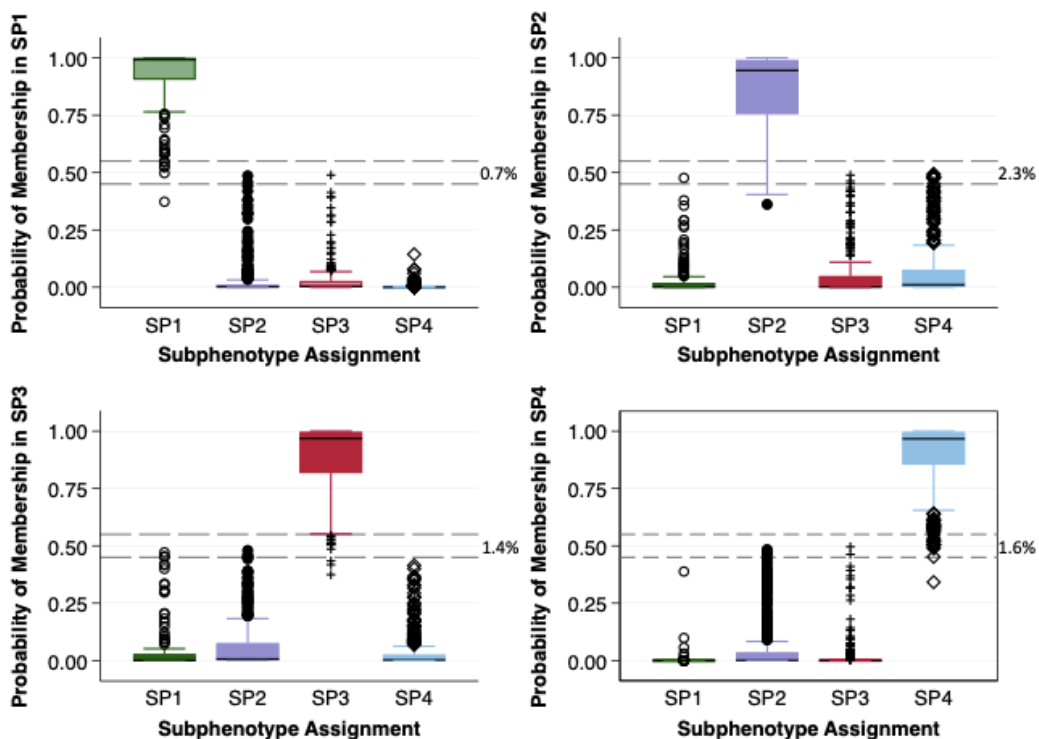

**e-Figure 3: Distribution of subphenotypes by U.S. region**

Regions composed of the following U.S. states (only states that contributed to the STOP-COVID database are listed). *Northeast*: Connecticut, Washington D.C., Massachusetts, Maryland, New Jersey, New York, Pennsylvania; *South*: Alabama, Florida, Louisiana, North Carolina, Tennessee, Texas, Virginia; *Midwest*: Illinois, Indiana, Kentucky, Michigan, Minnesota, Missouri, Ohio, Oklahoma, Wisconsin; *West*: Arizona, California, Colorado, Nevada, Oregon, Washington.

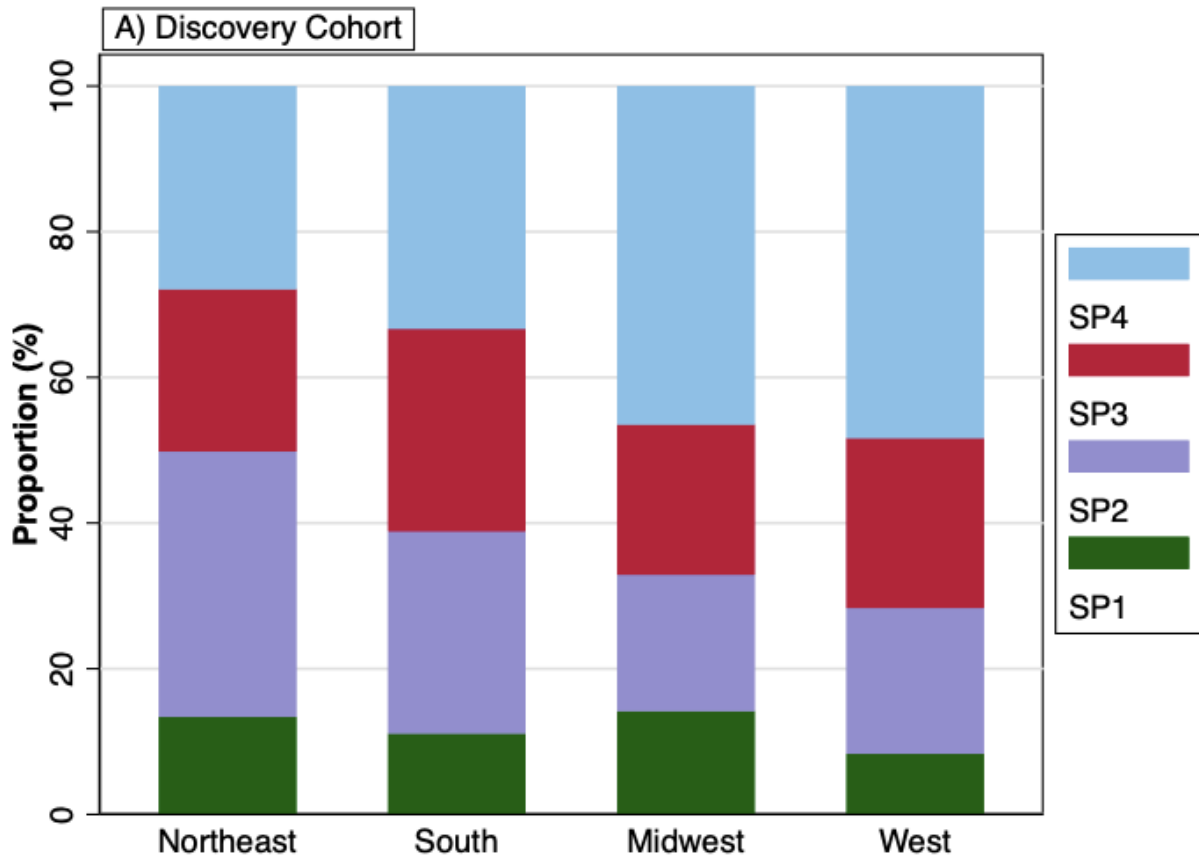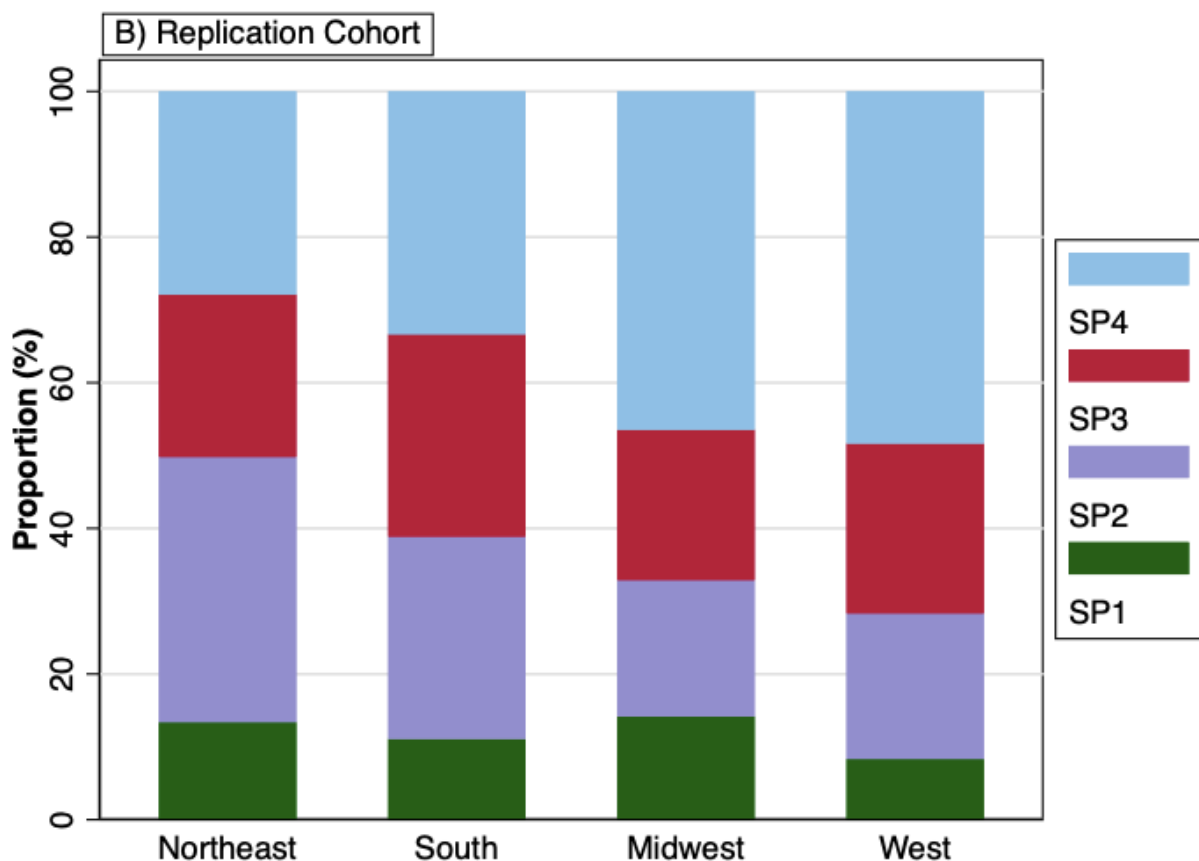

**e-Figure 4: Heatmap displaying the standardized values for each variable across each COVID-19 subphenotype in the Discovery cohort, restricted to only those patients receiving invasive mechanical ventilation on ICU Day 1**

The heatmap is divided into two sections: Latent class-defining variables (top), and baseline characteristics that were not used to define class membership (bottom). Within each section, variables are ordered by standardized mean values, lowest to highest, among Discovery cohort patients assigned to subphenotype 1 (SP1). Variables were standardized by scaling to a mean = 0 and a standard deviation = 1 and represented graphically using a continuous color scale. A variable with value +1 represents a mean value for that subphenotype which is 1 SD above the mean value for the entire cohort population.

| Subphenotype                          | SP1                             | SP2           | SP3           | SP4           |
|---------------------------------------|---------------------------------|---------------|---------------|---------------|
|                                       | N=194 (13.6%)                   | N=448 (31.4%) | N=300 (21.0%) | N=486 (34.0%) |
| <b>Class-Defining Variables</b>       | Arterial pH                     |               |               |               |
|                                       | Albumin                         |               |               |               |
|                                       | Lowest Systolic Blood Pressure  |               |               |               |
|                                       | Hemoglobin                      |               |               |               |
|                                       | Lymphocyte %                    |               |               |               |
|                                       | Highest Respiratory Rate        |               |               |               |
|                                       | Highest Temperature             |               |               |               |
|                                       | Platelets                       |               |               |               |
|                                       | Coinfection                     |               |               |               |
|                                       | CRP                             |               |               |               |
|                                       | Sodium                          |               |               |               |
|                                       | Creatinine                      |               |               |               |
|                                       | Altered Mental Status           |               |               |               |
|                                       | Highest Heart Rate              |               |               |               |
|                                       | Total Bilirubin                 |               |               |               |
|                                       | Procalcitonin                   |               |               |               |
|                                       | Creatine Kinase                 |               |               |               |
|                                       | Respiratory Failure Severity    |               |               |               |
|                                       | Ferritin                        |               |               |               |
|                                       | Lactate                         |               |               |               |
|                                       | D-Dimer                         |               |               |               |
|                                       | White Blood Cell Count          |               |               |               |
|                                       | Vasopressors                    |               |               |               |
|                                       | AST                             |               |               |               |
|                                       | ALT                             |               |               |               |
|                                       | <b>Baseline Characteristics</b> | Asthma        |               |               |
| Solid Organ Transplant                |                                 |               |               |               |
| Male                                  |                                 |               |               |               |
| HIV/AIDS                              |                                 |               |               |               |
| Body Mass Index                       |                                 |               |               |               |
| Atrial Fibrillation                   |                                 |               |               |               |
| Congestive Heart Failure              |                                 |               |               |               |
| Chronic Obstructive Pulmonary Disease |                                 |               |               |               |
| Blood Type A                          |                                 |               |               |               |
| Coronary Artery Disease               |                                 |               |               |               |
| Hispanic                              |                                 |               |               |               |
| Outpatient Anticoagulation            |                                 |               |               |               |
| Outpatient Immunosuppression          |                                 |               |               |               |
| Diabetes Mellitus                     |                                 |               |               |               |
| Outpatient ACEI or ARB                |                                 |               |               |               |
| Age                                   |                                 |               |               |               |
| Active Malignancy                     |                                 |               |               |               |
| Hypertension                          |                                 |               |               |               |
| Bone Marrow Transplant                |                                 |               |               |               |
| Chronic Liver Disease                 |                                 |               |               |               |
| Smoker                                |                                 |               |               |               |
| White Race                            |                                 |               |               |               |
| Chronic Kidney Disease                |                                 |               |               |               |

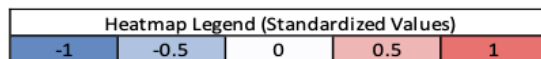

Supplement: mmc1.pdf [file mmc1.pdf]
